# Supplementary material for: Partial replacement of chemical fertilizers with different types of animal manure enhances soil ecological multifunctionality and foxtail millet yield by improving soil environment and regulating microbial functions
Source: Research Square preprint supplement (doi:10.21203/rs.3.rs-8722944/v1), 2026-02-06
Supplement: Supplementary file 2 [file eae9d49b7b308e67ccd7e3e4.xlsx]

## Sheet: Supplementary Table 1
Table S1. Nitrogen, phosphorus and potassium inputs in fertilization treatments (kg/hm2).
Treatment	Chemical fertilizer input			Manure fertilizer input			Total input
	N	P2O5	K2O	N	P2O5	K2O	N	P2O5	K2O
NPK	225	135	112.5	0	0	0	225	135	112.5
CM	112.5	27.5	64	112.5	107.5	48.5	225	135	112.5
PM	112.5	50	60	112.5	85	52.5	225	135	112.5
SM	112.5	29	73.3	112.5	106	39.2	225	135	112.5
NPK: pure chemical fertilizer; CM: cow manure replacement; PM: pig manure replacement; SM: sheep manure replacement.

## Sheet: Supplementary Table 2
Table S2. Effects of different fertilization regimes on soil microbial alpha diversity.
Treatment	Bacteria			Fungi			Archaea
	Observed species	Shannon index	Chao1 index	Observed species	Shannon index	Chao1 index	Observed species	Shannon index	Chao1 index
NPK	17036.67±54.52c	7.72±0.02b	17405.73±88.10b	129.67±5.69b	5.50±0.31b	145.43±9.41c	528.67±5.69b	2.62±0.07b	558.12±5.85a
CM	17171.33±79.39b	7.86±0.03a	17707.90±121.82a	152.67±6.35a	4.86±0.05c	204.50±20.59a	563.33±3.06a	3.29±0.07a	580.56±10.81a
PM	17318.00±46.89a	7.74±0.01b	17786.11±24.38a	159.00±3.61a	6.28±0.07a	178.12±5.88b	537.00±12.77b	2.63±0.22b	574.27±15.88a
SM	17283.00±47.29ab	7.73±0.01b	17757.48±64.08a	163.33±5.51a	5.99±0.06a	177.53±1.41b	553.67±2.31a	2.67±0.06b	584.70±12.35a
Values are the means ± standard error (n = 3). NPK: pure chemical fertilizer; CM: cow manure replacement; PM: pig manure replacement; SM: sheep manure replacement. Different small letters indicate a significant difference among treatments at p < 0.05 based on one-way ANOVA followed by Duncan’s multiple range test.

## Sheet: Supplementary Table 3
Table S3. The results of a fixed factor PERMANOVA were perforomed to compare the microbial community structure in different treatment regimes.
Source	df	SS	MS	Pseudo-F	P (perm)	Unique perms
Treatment	3	193.8	64.599	3.5611	0.002	961
Res	8	145.12	18.14
Total	11	338.92

## Sheet: Supplementary Table 4
Table S4. Effects of different fertilization regimes on the relative abundance of dominant taxa of bacteria, fungi and archaea at the phylum level.
Treatments	Species	NPK	CM	PM	SM
Bacteria	Proteobacteria	0.332±0.003b	0.343±0.004a	0.340±0.007ab	0.318±0.002c
	Bacteria_unclassified	0.146±0.002b	0.141±0.002b	0.159±0.004a	0.155±0.002a
	Acidobacteria	0.141±0.003a	0.121±0.002c	0.131±0.002b	0.139±0.001a
	Actinobacteria	0.086±0.003a	0.086±0.000a	0.079±0.003b	0.085±0.001a
	Bacteroidetes	0.078±0.002b	0.074±0.002b	0.085±0.003a	0.087±0.002a
	Gemmatimonadetes	0.062±0.003b	0.088±0.005a	0.065±0.004b	0.068±0.002b
	Chloroflexi	0.050±0.001a	0.045±0.001b	0.041±0.001c	0.045±0.000b
	Verrucomicrobia	0.028±0.000a	0.027±0.001a	0.028±0.003a	0.030±0.001a
	Candidatus_Rokubacteria	0.023±0.000a	0.017±0.000c	0.019±0.001b	0.019±0.000b
	Nitrospirae	0.019±0.000a	0.017±0.001ab	0.016±0.002bc	0.014±0.000c
	Planctomycetes	0.013±0.000c	0.016±0.000a	0.013±0.000c	0.014±0.000b
Fungi	Ascomycota	0.382±0.016b	0.214±0.007c	0.564±0.110a	0.393±0.020b
	Mucoromycota	0.397±0.006a	0.234±0.005b	0.270±0.097b	0.442±0.009a
	Basidiomycota	0.177±0.014a	0.085±0.001c	0.118±0.017b	0.109±0.008b
	Chytridiomycota	0.005±0.001c	0.396±0.006a	0.022±0.012bc	0.032±0.014b
	Zoopagomycota	0.023±0.010b	0.038±0.006a	0.015±0.005b	0.012±0.002b
	Microsporidia	0.003±0.001b	0.012±0.007a	0.008±0.003ab	0.008±0.001ab
	Blastocladiomycota	0.002±0.002b	0.013±0.002a	0.002±0.001b	0.001±0.001b
Archaea	Thaumarchaeota	0.861±0.002a	0.833±0.006c	0.849±0.004b	0.854±0.003ab
	Archaea_unclassified	0.070±0.001c	0.067±0.001d	0.074±0.000a	0.072±0.001b
	Crenarchaeota	0.039±0.001b	0.053±0.005a	0.045±0.003b	0.041±0.002b
	Euryarchaeota	0.023±0.001b	0.036±0.001a	0.024±0.002b	0.025±0.002b
	Candidatus_Bathyarchaeota	0.005±0.000b	0.006±0.000a	0.005±0.000b	0.005±0.000b
Values are the means ± standard error (n = 3). NPK: pure chemical fertilizer; CM: cow manure replacement; PM: pig manure replacement; SM: sheep manure replacement. Different small letters indicate a significant difference among treatments at p < 0.05 based on one-way ANOVA followed by Duncan’s multiple range test.

## Sheet: Supplementary Table 5
Table S5. Biomarkers enriched in the microbial communities under different fertilization regimes.
Kingdom	Phylum	Class	Order	Family	Genus	Species	NPK	CM	PM	SM
d__Bacteria	p__Proteobacteria	c__Betaproteobacteria	o__Burkholderiales	f__Burkholderiales_unclassified	g__Rivibacter		√
d__Bacteria	p__Actinobacteria	c__Actinobacteria	o__Actinobacteria_unclassified	f__Actinobacteria_unclassified	g__Actinobacteria_unclassified	s__Actinobacteria_bacterium	√
d__Bacteria	p__Candidatus_Rokubacteria						√
d__Bacteria	p__Proteobacteria	c__Betaproteobacteria	o__Burkholderiales				√
d__Bacteria	p__Actinobacteria	c__Actinobacteria	o__Actinobacteria_unclassified	f__Actinobacteria_unclassified			√
d__Bacteria	p__Candidatus_Rokubacteria	c__Candidatus_Rokubacteria_unclassified	o__Candidatus_Rokubacteria_unclassified				√
d__Bacteria	p__Chloroflexi	c__Chloroflexi_unclassified	o__Chloroflexi_unclassified	f__Chloroflexi_unclassified			√
d__Bacteria	p__Actinobacteria	c__Actinobacteria	o__Actinobacteria_unclassified	f__Actinobacteria_unclassified	g__Actinobacteria_unclassified		√
d__Bacteria	p__Proteobacteria	c__Betaproteobacteria	o__Burkholderiales	f__Burkholderiales_unclassified			√
d__Bacteria	p__Proteobacteria	c__Betaproteobacteria					√
d__Bacteria	p__Proteobacteria	c__Betaproteobacteria	o__Burkholderiales	f__Burkholderiales_unclassified	g__Rivibacter	s__Rivibacter_sp__C1_9	√
d__Bacteria	p__Chloroflexi	c__Chloroflexi_unclassified	o__Chloroflexi_unclassified				√
d__Bacteria	p__Proteobacteria	c__Betaproteobacteria	o__Betaproteobacteria_unclassified				√
d__Bacteria	p__Candidatus_Rokubacteria	c__Candidatus_Rokubacteria_unclassified					√
d__Bacteria	p__Proteobacteria	c__Betaproteobacteria	o__Betaproteobacteria_unclassified	f__Betaproteobacteria_unclassified	g__Betaproteobacteria_unclassified		√
d__Bacteria	p__Candidatus_Rokubacteria	c__Candidatus_Rokubacteria_unclassified	o__Candidatus_Rokubacteria_unclassified	f__Candidatus_Rokubacteria_unclassified			√
d__Bacteria	p__Chloroflexi	c__Chloroflexi_unclassified					√
d__Bacteria	p__Chloroflexi						√
d__Bacteria	p__Candidatus_Rokubacteria	c__Candidatus_Rokubacteria_unclassified	o__Candidatus_Rokubacteria_unclassified	f__Candidatus_Rokubacteria_unclassified	g__Candidatus_Rokubacteria_unclassified	s__Candidatus_Rokubacteria_bacterium	√
d__Bacteria	p__Candidatus_Rokubacteria	c__Candidatus_Rokubacteria_unclassified	o__Candidatus_Rokubacteria_unclassified	f__Candidatus_Rokubacteria_unclassified	g__Candidatus_Rokubacteria_unclassified		√
d__Bacteria	p__Proteobacteria	c__Betaproteobacteria	o__Betaproteobacteria_unclassified	f__Betaproteobacteria_unclassified			√
d__Bacteria	p__Proteobacteria	c__Betaproteobacteria	o__Betaproteobacteria_unclassified	f__Betaproteobacteria_unclassified	g__Betaproteobacteria_unclassified	s__Betaproteobacteria_bacterium	√
d__Bacteria	p__Actinobacteria	c__Actinobacteria	o__Actinobacteria_unclassified				√
d__Bacteria	p__Proteobacteria	c__Alphaproteobacteria	o__Sphingomonadales					√	√	√
d__Bacteria	p__Proteobacteria	c__Gammaproteobacteria	o__Xanthomonadales	f__Xanthomonadaceae				√	√	√
d__Bacteria	p__Proteobacteria	c__Alphaproteobacteria	o__Sphingomonadales	f__Erythrobacteraceae	g__Altererythrobacter			√	√	√
d__Bacteria	p__Proteobacteria	c__Alphaproteobacteria	o__Sphingomonadales	f__Sphingomonadaceae	g__Sphingomonas			√	√	√
d__Bacteria	p__Proteobacteria	c__Alphaproteobacteria	o__Sphingomonadales	f__Sphingomonadaceae				√	√	√
d__Bacteria	p__Proteobacteria	c__Alphaproteobacteria						√	√	√
d__Eukaryota	p__Basidiomycota						√
d__Eukaryota	p__Basidiomycota	c__Agaricomycetes	o__Hymenochaetales	f__Hymenochaetaceae	g__Phellinidium	s__Phellinidium_pouzarii	√
d__Eukaryota	p__Eukaryota_unclassified	c__Eukaryota_unclassified	o__Eukaryota_unclassified				√
d__Eukaryota	p__Eukaryota_unclassified						√
d__Eukaryota	p__Basidiomycota	c__Agaricomycetes	o__Hymenochaetales	f__Hymenochaetaceae	g__Phellinidium		√
d__Eukaryota	p__Basidiomycota	c__Agaricomycetes	o__Polyporales				√
d__Eukaryota	p__Basidiomycota	c__Agaricomycetes	o__Cantharellales	f__Ceratobasidiaceae	g__Rhizoctonia		√
d__Eukaryota	p__Eukaryota_unclassified	c__Eukaryota_unclassified	o__Eukaryota_unclassified	f__Eukaryota_unclassified	g__Eukaryota_unclassified	s__Eukaryota_unclassified	√
d__Eukaryota	p__Zoopagomycota	c__Harpellomycetes	o__Harpellales				√
d__Eukaryota	p__Zoopagomycota	c__Harpellomycetes					√
d__Eukaryota	p__Basidiomycota	c__Agaricomycetes	o__Cantharellales	f__Ceratobasidiaceae	g__Rhizoctonia	s__Rhizoctonia_solani	√
d__Eukaryota	p__Ascomycota	c__Dothideomycetes	o__Pleosporales	f__Pleosporaceae	g__Alternaria	s__Alternaria_arborescens	√
d__Eukaryota	p__Zoopagomycota	c__Harpellomycetes	o__Harpellales	f__Legeriomycetaceae			√
d__Eukaryota	p__Eukaryota_unclassified	c__Eukaryota_unclassified	o__Eukaryota_unclassified	f__Eukaryota_unclassified			√
d__Eukaryota	p__Ascomycota	c__Dothideomycetes	o__Pleosporales	f__Pleosporaceae	g__Alternaria		√
d__Eukaryota	p__Basidiomycota	c__Agaricomycetes	o__Russulales	f__Peniophoraceae	g__Peniophora		√
d__Eukaryota	p__Zoopagomycota	c__Harpellomycetes	o__Harpellales	f__Legeriomycetaceae	g__Smittium	s__Smittium_culicis	√
d__Eukaryota	p__Basidiomycota	c__Agaricomycetes	o__Hymenochaetales	f__Hymenochaetaceae			√
d__Eukaryota	p__Zoopagomycota	c__Harpellomycetes	o__Harpellales	f__Legeriomycetaceae	g__Smittium		√
d__Eukaryota	p__Basidiomycota	c__Exobasidiomycetes	o__Tilletiales	f__Tilletiaceae	g__Tilletia	s__Tilletia_controversa	√
d__Eukaryota	p__Eukaryota_unclassified	c__Eukaryota_unclassified	o__Eukaryota_unclassified	f__Eukaryota_unclassified	g__Eukaryota_unclassified		√
d__Eukaryota	p__Ascomycota	c__Sordariomycetes	o__Sordariales	f__Sordariaceae	g__Sordaria	s__Sordaria_macrospora	√
d__Eukaryota	p__Basidiomycota	c__Agaricomycetes	o__Hymenochaetales				√
d__Eukaryota	p__Ascomycota	c__Sordariomycetes	o__Sordariales	f__Sordariaceae	g__Sordaria		√
d__Eukaryota	p__Basidiomycota	c__Agaricomycetes	o__Russulales	f__Peniophoraceae			√
d__Eukaryota	p__Basidiomycota	c__Agaricomycetes					√
d__Eukaryota	p__Eukaryota_unclassified	c__Eukaryota_unclassified					√
d__Eukaryota	p__Basidiomycota	c__Agaricomycetes	o__Russulales	f__Peniophoraceae	g__Peniophora	s__Peniophora_sp__CBMAI_1063	√
d__Eukaryota	p__Microsporidia							√	√	√
d__Eukaryota	p__Chytridiomycota	c__Chytridiomycetes	o__Spizellomycetales	f__Powellomycetaceae	g__Powellomyces			√	√	√
d__Eukaryota	p__Chytridiomycota	c__Chytridiomycetes	o__Chytridiomycetes_unclassified	f__Chytridiomycetes_unclassified	g__Blyttiomyces			√	√	√
d__Eukaryota	p__Ascomycota	c__Sordariomycetes	o__Sordariales	f__Chaetomiaceae	g__Chaetomium			√	√	√
d__Eukaryota	p__Ascomycota	c__Sordariomycetes	o__Sordariales	f__Chaetomiaceae	g__Chaetomium	s__Chaetomium_thermophilum		√	√	√
d__Eukaryota	p__Chytridiomycota	c__Chytridiomycetes	o__Spizellomycetales	f__Powellomycetaceae				√	√	√
d__Eukaryota	p__Chytridiomycota							√	√	√
d__Eukaryota	p__Chytridiomycota	c__Chytridiomycetes	o__Spizellomycetales	f__Powellomycetaceae	g__Powellomyces	s__Powellomyces_hirtus		√	√	√
d__Eukaryota	p__Chytridiomycota	c__Chytridiomycetes						√	√	√
d__Eukaryota	p__Ascomycota	c__Sordariomycetes	o__Sordariales	f__Chaetomiaceae	g__Thermothelomyces			√	√	√
d__Eukaryota	p__Microsporidia	c__Microsporidia_unclassified						√	√	√
d__Eukaryota	p__Ascomycota	c__Sordariomycetes	o__Sordariales	f__Chaetomiaceae	g__Thermothelomyces	s__Thermothelomyces_thermophilus		√	√	√
d__Eukaryota	p__Chytridiomycota	c__Chytridiomycetes	o__Chytridiomycetes_unclassified	f__Chytridiomycetes_unclassified	g__Blyttiomyces	s__Blyttiomyces_helicus		√	√	√
d__Eukaryota	p__Microsporidia	c__Microsporidia_unclassified	o__Microsporidia_unclassified					√	√	√
d__Eukaryota	p__Chytridiomycota	c__Chytridiomycetes	o__Chytridiomycetes_unclassified	f__Chytridiomycetes_unclassified				√	√	√
d__Eukaryota	p__Chytridiomycota	c__Chytridiomycetes	o__Chytridiomycetes_unclassified					√	√	√
d__Archaea	p__Euryarchaeota							√	√	√

## Sheet: Supplementary Table 6
Table S6. Topological properties of the microbial co-occurrence network under different fertilization regimes.
Treatments		Total number of nodes	Total number of edges	Positive edges ratio (%)	Network density	Average degree	Average clustering coefficient	Average path length	Modularity
Bacteria	NPK	191	599	37.40	0.033	6.272	0.029	3.053	0.376
	CM	104	82	29.27	0.015	1.577	0.000	3.203	0.909
	PM	122	110	28.18	0.015	1.803	0.000	9.088	0.833
	SM	190	565	38.05	0.031	5.947	0.035	3.139	0.385
Fungi	NPK	297	1909	40.13	0.043	12.855	0.065	2.518	0.238
	CM	269	512	39.26	0.014	3.807	0.030	4.140	0.544
	PM	297	1388	36.60	0.032	9.347	0.045	2.781	0.287
	SM	297	1412	38.60	0.032	9.508	0.056	2.771	0.294
Archaea	NPK	106	69	28.99	0.012	1.302	0.000	2.006	0.944
	CM	171	151	34.44	0.010	1.766	0.000	7.611	0.879
	PM	165	146	41.10	0.011	1.770	0.000	8.939	0.866
	SM	149	113	35.40	0.010	1.517	0.000	3.473	0.930

## Sheet: Supplementary Table 7
Table S7. The classification of microbial network keystones at each taxonomic level.
ID	Kingdom	Generalists	Phylum	Class	Order	Family	Genus	Species
Unigene63	Bacteria	Connectors	p__Bacteroidetes	c__Chitinophagia	o__Chitinophagales	f__Chitinophagaceae	g__Chitinophagaceae_unclassified	s__Chitinophagaceae_bacterium
Unigene61	Bacteria	Connectors	p__Bacteria_unclassified	c__Bacteria_unclassified	o__Bacteria_unclassified	f__Bacteria_unclassified	g__Bacteria_unclassified	s__uncultured_bacterium
Unigene7	Bacteria	Connectors	p__Proteobacteria	c__Betaproteobacteria	o__Betaproteobacteria_unclassified	f__Betaproteobacteria_unclassified	g__Betaproteobacteria_unclassified	s__Betaproteobacteria_bacterium
Unigene21	Bacteria	Connectors	p__Proteobacteria	c__Deltaproteobacteria	o__Deltaproteobacteria_unclassified	f__Deltaproteobacteria_unclassified	g__Deltaproteobacteria_unclassified	s__Deltaproteobacteria_bacterium_RIFCSPLOWO2_12_FULL_60_19
Unigene25	Bacteria	Connectors	p__Armatimonadetes	c__Armatimonadetes_unclassified	o__Armatimonadetes_unclassified	f__Armatimonadetes_unclassified	g__Armatimonadetes_unclassified	s__Armatimonadetes_bacterium
Unigene38	Bacteria	Connectors	p__Proteobacteria	c__Deltaproteobacteria	o__Deltaproteobacteria_unclassified	f__Deltaproteobacteria_unclassified	g__Deltaproteobacteria_unclassified	s__Deltaproteobacteria_bacterium
Unigene51	Bacteria	Connectors	p__Acidobacteria	c__Acidobacteria_unclassified	o__Acidobacteria_unclassified	f__Acidobacteria_unclassified	g__Acidobacteria_unclassified	s__Acidobacteria_bacterium_RIFCSPLOWO2_02_FULL_67_36
Unigene153	Bacteria	Connectors	p__Gemmatimonadetes	c__Gemmatimonadetes_unclassified	o__Gemmatimonadetes_unclassified	f__Gemmatimonadetes_unclassified	g__Gemmatimonadetes_unclassified	s__Gemmatimonadetes_bacterium
Unigene43	Bacteria	Connectors	p__Bacteroidetes	c__Chitinophagia	o__Chitinophagales	f__Chitinophagaceae	g__Chitinophagaceae_unclassified	s__Chitinophagaceae_bacterium
Unigene4	Bacteria	Connectors	p__Acidobacteria	c__Acidobacteria_unclassified	o__Acidobacteria_unclassified	f__Acidobacteria_unclassified	g__Acidobacteria_unclassified	s__Acidobacteria_bacterium
Unigene160	Bacteria	Connectors	p__Proteobacteria	c__Betaproteobacteria	o__Burkholderiales	f__Comamonadaceae	g__Alicycliphilus	s__Alicycliphilus_unclassified
Unigene217	Bacteria	Module hubs	p__Gemmatimonadetes	c__Gemmatimonadetes_unclassified	o__Gemmatimonadetes_unclassified	f__Gemmatimonadetes_unclassified	g__Gemmatimonadetes_unclassified	s__Gemmatimonadetes_bacterium
Unigene65	Bacteria	Module hubs	p__Bacteroidetes	c__Chitinophagia	o__Chitinophagales	f__Chitinophagaceae	g__Lacibacter	s__Lacibacter_cauensis
Unigene1963	Archaea	Connectors	p__Thaumarchaeota	c__Thaumarchaeota_unclassified	o__Nitrosopumilales	f__Nitrosopumilales_unclassified	g__Nitrosopumilales_unclassified	s__Nitrosopumilales_archaeon
Unigene7194	Archaea	Connectors	p__Thaumarchaeota	c__Thaumarchaeota_unclassified	o__Nitrosopumilales	f__Nitrosopumilales_unclassified	g__Nitrosopumilales_unclassified	s__Nitrosopumilales_archaeon
Unigene9162	Archaea	Connectors	p__Thaumarchaeota	c__Nitrososphaeria	o__Nitrososphaerales	f__Nitrososphaeraceae	g__Candidatus_Nitrosocosmicus	s__Candidatus_Nitrosocosmicus_sp._SS
Unigene4291	Archaea	Connectors	p__Thaumarchaeota	c__Thaumarchaeota_unclassified	o__Nitrosopumilales	f__Nitrosopumilales_unclassified	g__Nitrosopumilales_unclassified	s__Nitrosopumilales_archaeon
Unigene6676	Archaea	Connectors	p__Thaumarchaeota	c__Thaumarchaeota_unclassified	o__Nitrosopumilales	f__Nitrosopumilales_unclassified	g__Nitrosopumilales_unclassified	s__Nitrosopumilales_archaeon
Unigene8243	Archaea	Connectors	p__Thaumarchaeota	c__Nitrososphaeria	o__Nitrososphaerales	f__Nitrososphaeraceae	g__Nitrososphaera	s__Candidatus_Nitrososphaera_gargensis
Unigene1796	Archaea	Connectors	p__Thaumarchaeota	c__Thaumarchaeota_unclassified	o__Thaumarchaeota_unclassified	f__Thaumarchaeota_unclassified	g__Thaumarchaeota_unclassified	s__Thaumarchaeota_archaeon
Unigene1478	Archaea	Connectors	p__Thaumarchaeota	c__Thaumarchaeota_unclassified	o__Thaumarchaeota_unclassified	f__Thaumarchaeota_unclassified	g__Thaumarchaeota_unclassified	s__Thaumarchaeota_archaeon
Unigene8791	Archaea	Connectors	p__Thaumarchaeota	c__Thaumarchaeota_unclassified	o__Thaumarchaeota_unclassified	f__Thaumarchaeota_unclassified	g__Thaumarchaeota_unclassified	s__Thaumarchaeota_archaeon
Unigene4827	Archaea	Connectors	p__Thaumarchaeota	c__Thaumarchaeota_unclassified	o__Nitrosopumilales	f__Nitrosopumilales_unclassified	g__Nitrosopumilales_unclassified	s__Nitrosopumilales_archaeon
Unigene2387	Archaea	Connectors	p__Thaumarchaeota	c__Thaumarchaeota_unclassified	o__Nitrosopumilales	f__Nitrosopumilales_unclassified	g__Nitrosopumilales_unclassified	s__Nitrosopumilales_archaeon
Unigene2090	Archaea	Connectors	p__Crenarchaeota	c__Crenarchaeota_unclassified	o__Crenarchaeota_unclassified	f__Crenarchaeota_unclassified	g__Crenarchaeota_unclassified	s__uncultured_crenarchaeote_76h13
Unigene6529	Archaea	Connectors	p__Thaumarchaeota	c__Thaumarchaeota_unclassified	o__Nitrosopumilales	f__Nitrosopumilales_unclassified	g__Nitrosopumilales_unclassified	s__Nitrosopumilales_archaeon
Unigene5881	Archaea	Connectors	p__Thaumarchaeota	c__Thaumarchaeota_unclassified	o__Nitrosopumilales	f__Nitrosopumilales_unclassified	g__Nitrosopumilales_unclassified	s__Nitrosopumilales_archaeon
Unigene6456	Archaea	Connectors	p__Thaumarchaeota	c__Thaumarchaeota_unclassified	o__Thaumarchaeota_unclassified	f__Thaumarchaeota_unclassified	g__Thaumarchaeota_unclassified	s__Thaumarchaeota_archaeon
Unigene6099	Archaea	Network hubs	p__Thaumarchaeota	c__Thaumarchaeota_unclassified	o__Nitrosopumilales	f__Nitrosopumilales_unclassified	g__Nitrosopumilales_unclassified	s__Nitrosopumilales_archaeon
Unigene255	Archaea	Module hubs	p__Thaumarchaeota	c__Thaumarchaeota_unclassified	o__Nitrosopumilales	f__Nitrosopumilales_unclassified	g__Nitrosopumilales_unclassified	s__Nitrosopumilales_archaeon

## Sheet: Supplementary Table 8
Table S8. KEGG enrichment analysis of DEGs in foxtail millet rhizosphere soil under different fertilization conditions.
Group	KEGG ID	Description	Rich Factor	p Value	Significance	Gene Number
						Total	Up	Down
CM/NPK	map01100	Metabolic pathways	0.163	0	****	55573	29165	26408
	map01110	Biosynthesis of secondary metabolites	0.1589	0	****	24137	12895	11242
	map01120	Microbial metabolism in diverse environments	0.1552	0	****	17005	8678	8327
	map01200	Carbon metabolism	0.148	0	****	9007	4733	4274
	map01230	Biosynthesis of amino acids	0.1531	0	****	8253	4233	4020
	map01240	Biosynthesis of cofactors	0.1652	0	****	8587	4705	3882
	map02020	Two-component system	0.1717	0	****	8666	4266	4400
	map02010	ABC transporters	0.1518	0	****	4667	2082	2585
	map02024	Quorum sensing	0.1584	0	****	4570	1875	2695
	map00190	Oxidative phosphorylation	0.1543	0	****	4322	2354	1968
	map00230	Purine metabolism	0.1686	0	****	4643	2431	2212
	map00630	Glyoxylate and dicarboxylate metabolism	0.1379	0	****	3283	1640	1643
	map00620	Pyruvate metabolism	0.1461	0	****	3377	1723	1654
	map03010	Ribosome	0.1516	0	****	3313	1901	1412
	map00010	Glycolysis / Gluconeogenesis	0.1525	0	****	3146	1603	1543
	map00970	Aminoacyl-tRNA biosynthesis	0.1619	0	****	3335	1854	1481
	map00250	Alanine, aspartate and glutamate metabolism	0.1484	0	****	2996	1558	1438
	map00020	Citrate cycle (TCA cycle)	0.1395	0	****	2745	1471	1274
	map00270	Cysteine and methionine metabolism	0.1575	0	****	2772	1405	1367
	map00520	Amino sugar and nucleotide sugar metabolism	0.1737	0	****	3004	1627	1377
	map00280	Valine, leucine and isoleucine degradation	0.1409	0	****	2430	1357	1073
	map00260	Glycine, serine and threonine metabolism	0.1571	0	****	2678	1416	1262
	map00640	Propanoate metabolism	0.1408	0	****	2368	1256	1112
	map01212	Fatty acid metabolism	0.1569	0	****	2636	1349	1287
	map00650	Butanoate metabolism	0.1517	0	****	2492	1200	1292
	map00240	Pyrimidine metabolism	0.1602	0	****	2537	1334	1203
	map01210	2-Oxocarboxylic acid metabolism	0.1442	0	****	2149	1043	1106
	map00680	Methane metabolism	0.1512	0	****	2233	1076	1157
	map00500	Starch and sucrose metabolism	0.1779	0	****	2276	1180	1096
	map00071	Fatty acid degradation	0.1533	0	****	1848	932	916
	map03420	Nucleotide excision repair	0.1539	0	****	1833	1023	810
	map00030	Pentose phosphate pathway	0.1698	0	****	1994	1061	933
	map03440	Homologous recombination	0.1686	0	****	1884	1115	769
	map03070	Bacterial secretion system	0.1698	0	****	1837	941	896
	map00330	Arginine and proline metabolism	0.1637	0	****	1766	901	865
	map03430	Mismatch repair	0.1684	0	****	1786	1075	711
	map00550	Peptidoglycan biosynthesis	0.1867	0	****	1976	1169	807
	map03030	DNA replication	0.177	0	****	1762	1006	756
	map00061	Fatty acid biosynthesis	0.1628	0	****	1616	859	757
	map00360	Phenylalanine metabolism	0.1725	0	****	1628	876	752
	map01501	beta-Lactam resistance	0.1859	0	****	1659	962	697
	map03410	Base excision repair	0.1869	0	****	1296	763	533
	map00790	Folate biosynthesis	0.192	0	****	1244	669	575
	map00564	Glycerophospholipid metabolism	0.1913	2e-307	****	1202	672	530
	map00480	Glutathione metabolism	0.1647	6e-299	****	1460	833	627
	map00380	Tryptophan metabolism	0.1525	9e-298	****	1651	899	752
	map00910	Nitrogen metabolism	0.156	1e-297	****	1588	830	758
	map02030	Bacterial chemotaxis	0.1701	6.48319e-291	****	1350	735	615
	map00860	Porphyrin metabolism	0.1691	9.57419e-288	****	1348	751	597
	map00362	Benzoate degradation	0.1587	2.24342e-287	****	1490	672	818
	map03018	RNA degradation	0.136	9.56119e-278	****	1899	1030	869
	map00541	O-Antigen nucleotide sugar biosynthesis	0.1641	1.14086e-276	****	1359	767	592
	map00760	Nicotinate and nicotinamide metabolism	0.1673	2.10911e-271	****	1293	747	546
	map00051	Fructose and mannose metabolism	0.1733	5.90569e-270	****	1218	606	612
	map03020	RNA polymerase	0.1453	2.45331e-268	****	1621	847	774
	map03060	Protein export	0.1608	2.81008e-268	****	1361	750	611
	map01220	Degradation of aromatic compounds	0.1763	9.73916e-268	****	1177	541	636
	map00220	Arginine biosynthesis	0.153	3.26414e-263	****	1452	768	684
	map00052	Galactose metabolism	0.1693	1.46475e-258	****	1209	636	573
	map00400	Phenylalanine, tyrosine and tryptophan biosynthesis	0.1686	7.79298e-252	****	1185	639	546
	map00920	Sulfur metabolism	0.1593	1.55808e-246	****	1270	630	640
	map00300	Lysine biosynthesis	0.1683	1.62655e-238	****	1125	607	518
	map00770	Pantothenate and CoA biosynthesis	0.1506	5.15288e-237	****	1343	684	659
	map00450	Selenocompound metabolism	0.1513	1.48889e-225	****	1267	660	607
	map00350	Tyrosine metabolism	0.163	1.74555e-225	****	1119	593	526
	map01503	Cationic antimicrobial peptide (CAMP) resistance	0.1769	5.45985e-211	****	922	524	398
	map00540	Lipopolysaccharide biosynthesis	0.1882	8.15294e-205	****	818	353	465
	map00340	Histidine metabolism	0.1613	1.16254e-199	****	1007	525	482
	map00780	Biotin metabolism	0.1685	1.41231e-195	****	920	514	406
	map00670	One carbon pool by folate	0.1533	6.39934e-195	****	1070	576	494
	map00521	Streptomycin biosynthesis	0.1752	2.83875e-182	****	807	399	408
	map00290	Valine, leucine and isoleucine biosynthesis	0.1434	1.28896e-176	****	1092	506	586
	map00130	Ubiquinone and other terpenoid-quinone biosynthesis	0.1749	2.61738e-176	****	783	421	362
	map00511	Other glycan degradation	0.1976	9.00896e-175	****	652	308	344
	map00310	Lysine degradation	0.1404	3.47744e-174	****	1120	623	497
	map00460	Cyanoamino acid metabolism	0.1752	4.09846e-164	****	726	381	345
	map00900	Terpenoid backbone biosynthesis	0.151	6.82874e-163	****	917	486	431
	map00627	Aminobenzoate degradation	0.1673	5.70265e-159	****	755	380	375
	map00561	Glycerolipid metabolism	0.1692	7.03272e-156	****	727	407	320
	map00040	Pentose and glucuronate interconversions	0.1584	8.9741e-147	****	761	402	359
	map01502	Vancomycin resistance	0.1843	9.76543e-139	****	569	337	232
	map02040	Flagellar assembly	0.1555	2.26176e-138	****	739	413	326
	map04122	Sulfur relay system	0.1654	4.76361e-127	****	613	310	303
	map00730	Thiamine metabolism	0.1498	7.15725e-124	****	705	382	323
	map00410	beta-Alanine metabolism	0.1432	8.93325e-122	****	752	362	390
	map00562	Inositol phosphate metabolism	0.16	1.05758e-120	****	614	286	328
	map00430	Taurine and hypotaurine metabolism	0.161	1.18667e-108	****	546	302	244
	map03450	Non-homologous end-joining	0.1761	1.45138e-108	****	474	242	232
	map00740	Riboflavin metabolism	0.1822	2.22648e-94	****	391	222	169
	map00660	C5-Branched dibasic acid metabolism	0.1318	4.72015e-93	****	673	310	363
	map00643	Styrene degradation	0.1699	2.24791e-92	****	425	233	192
	map00261	Monobactam biosynthesis	0.1469	3.08995e-88	****	517	277	240
	map00053	Ascorbate and aldarate metabolism	0.1454	1.16031e-84	****	505	252	253
	map00523	Polyketide sugar unit biosynthesis	0.175	3.81161e-84	****	369	201	168
	map00625	Chloroalkane and chloroalkene degradation	0.1482	9.53605e-82	****	471	243	228
	map00361	Chlorocyclohexane and chlorobenzene degradation	0.1801	1.28871e-75	****	317	158	159
	map00750	Vitamin B6 metabolism	0.1573	1.06056e-73	****	382	226	156
	map00401	Novobiocin biosynthesis	0.1873	5.34414e-72	****	285	137	148
	map00623	Toluene degradation	0.2051	1.48236e-64	****	225	102	123
	map00600	Sphingolipid metabolism	0.1711	6.30661e-62	****	279	107	172
	map00930	Caprolactam degradation	0.1638	8.81212e-60	****	288	140	148
	map00906	Carotenoid biosynthesis	0.1975	4.00897e-51	****	186	82	104
	map02060	Phosphotransferase system (PTS)	0.1739	1.94998e-50	****	220	160	60
	map00364	Fluorobenzoate degradation	0.1864	2.76254e-50	****	198	84	114
	map00903	Limonene degradation	0.1412	7.24423e-47	****	290	150	140
	map00311	Penicillin and cephalosporin biosynthesis	0.196	4.1371e-45	****	165	85	80
	map00720	Carbon fixation pathways in prokaryotes	0.1592	2.16779e-41	****	206	47	159
	map01054	Nonribosomal peptide structures	0.19	4.94758e-40	****	152	81	71
	map00626	Naphthalene degradation	0.1512	8.32824e-40	****	216	113	103
	map00525	Acarbose and validamycin biosynthesis	0.1602	6.34924e-38	****	186	100	86
	map01040	Biosynthesis of unsaturated fatty acids	0.1754	7.45413e-38	****	161	90	71
	map00622	Xylene degradation	0.1741	6.29323e-32	****	136	63	73
	map01059	Biosynthesis of enediyne antibiotics	0.1458	1.10182e-30	****	175	99	76
	map00785	Lipoic acid metabolism	0.162	2.72811e-29	****	139	86	53
	map02025	Biofilm formation - Pseudomonas aeruginosa	0.1512	7.60589e-28	****	148	89	59
	map00592	alpha-Linolenic acid metabolism	0.1655	1.96167e-21	****	96	45	51
	map01052	Type I polyketide structures	0.1773	2.36675e-21	****	86	44	42
	map01057	Biosynthesis of type II polyketide products	0.1855	1.70352e-20	****	77	30	47
	map00405	Phenazine biosynthesis	0.1766	7.1893e-20	****	80	57	23
	map01053	Biosynthesis of siderophore group nonribosomal peptides	0.1656	9.60306e-18	****	78	37	41
	map00195	Photosynthesis	0.3	3.30498e-17	****	36	22	14
	map01055	Biosynthesis of vancomycin group antibiotics	0.1729	7.0631e-17	****	69	39	30
	map00633	Nitrotoluene degradation	0.194	3.41554e-15	****	52	25	27
	map00565	Ether lipid metabolism	0.2189	4.71127e-15	****	44	18	26
	map00624	Polycyclic aromatic hydrocarbon degradation	0.1388	5.38963e-15	****	88	32	56
	map00984	Steroid degradation	0.1447	1.33376e-14	****	79	48	31
	map00440	Phosphonate and phosphinate metabolism	0.1531	1.29609e-13	****	66	28	38
	map01051	Biosynthesis of ansamycins	0.198	4.53648e-12	****	39	24	15
	map05134	Legionellosis	0.1015	1.59559e-11	****	138	70	68
	map00621	Dioxin degradation	0.1661	3.64011e-11	****	46	22	24
	map00998	Biosynthesis of various antibiotics	0.1673	4.58424e-11	****	45	31	14
	map00710	Carbon fixation in photosynthetic organisms	0.1176	1.38262e-10	****	84	29	55
	map00332	Carbapenem biosynthesis	0.1368	3.47514e-10	****	58	23	35
	map00590	Arachidonic acid metabolism	0.1593	1.39284e-08	****	36	16	20
	map05111	Biofilm formation - Vibrio cholerae	0.1508	2.57387e-08	****	38	18	20
	map04112	Cell cycle - Caulobacter	0.1528	6.3301e-08	****	35	28	7
	map00253	Tetracycline biosynthesis	0.2039	2.08565e-07	****	21	11	10
	map00791	Atrazine degradation	0.1562	3.25652e-07	****	30	8	22
	map03050	Proteasome	0.1268	3.73826e-07	****	44	12	32
	map00100	Steroid biosynthesis	0.1746	1.75773e-06	****	22	11	11
	map03022	Basal transcription factors	0.1691	1.83382e-06	****	23	1	22
	map00909	Sesquiterpenoid and triterpenoid biosynthesis	0.1346	1.48179e-05	****	28	14	14
	map00333	Prodigiosin biosynthesis	0.1613	1.72695e-05	****	20	15	5
	map00642	Ethylbenzene degradation	0.1753	2.39814e-05	****	17	5	12
	map00062	Fatty acid elongation	0.1758	3.94885e-05	****	16	8	8
	map00571	Lipoarabinomannan (LAM) biosynthesis	0.35	6.64537e-05	****	7	3	4
	map01056	Biosynthesis of type II polyketide backbone	0.2593	0.000539765	***	7	5	2
	map03015	mRNA surveillance pathway	0.2258	0.0013146	**	7	1	6
	map00572	Arabinogalactan biosynthesis - Mycobacterium	0.4286	0.00506557	**	3	2	1
	map00997	Biosynthesis of various other secondary metabolites	0.1707	0.0069204	**	7	1	6
	map00365	Furfural degradation	0.1129	0.00918247	**	14	1	13
	map00196	Photosynthesis - antenna proteins	0.3333	0.0111783	*	3	2	1
	map04626	Plant-pathogen interaction	0.5	0.017175	*	2	0	2
	map00999	Biosynthesis of various plant secondary metabolites	0.25	0.0258376	*	3	2	1
	map00331	Clavulanic acid biosynthesis	0.2	0.103233	ns	2	0	2
	map00522	Biosynthesis of 12-, 14- and 16-membered macrolides	0.1818	0.121685	ns	2	1	1
	map00121	Secondary bile acid biosynthesis	0.1143	0.127582	ns	4	2	2
	map02026	Biofilm formation - Escherichia coli	0.0968	0.246432	ns	3	0	3
	map00591	Linoleic acid metabolism	0.1053	0.285163	ns	2	0	2
	map00524	Neomycin, kanamycin and gentamicin biosynthesis	0.125	0.366988	ns	1	0	1
	map00363	Bisphenol degradation	0.1111	0.402155	ns	1	1	0
						280769	146827	133942
PM/NPK	map01100	Metabolic pathways	0.0972	0	****	33206	18060	15146
	map01110	Biosynthesis of secondary metabolites	0.0948	0	****	14424	7981	6443
	map01120	Microbial metabolism in diverse environments	0.0942	0	****	10333	5394	4939
	map01200	Carbon metabolism	0.0914	0	****	5570	3025	2545
	map01230	Biosynthesis of amino acids	0.094	0	****	5073	2801	2272
	map01240	Biosynthesis of cofactors	0.0993	0	****	5171	2900	2271
	map02020	Two-component system	0.1024	0	****	5170	2688	2482
	map02010	ABC transporters	0.0955	0	****	2936	1252	1684
	map02024	Quorum sensing	0.0936	0	****	2704	1145	1559
	map00190	Oxidative phosphorylation	0.0967	0	****	2713	1536	1177
	map00230	Purine metabolism	0.1001	0	****	2759	1528	1231
	map00630	Glyoxylate and dicarboxylate metabolism	0.0883	0	****	2104	1034	1070
	map00620	Pyruvate metabolism	0.0927	0	****	2147	1150	997
	map03010	Ribosome	0.0996	0	****	2185	1223	962
	map00010	Glycolysis / Gluconeogenesis	0.0942	0	****	1947	1068	879
	map00970	Aminoacyl-tRNA biosynthesis	0.0962	0	****	1980	1112	868
	map00270	Cysteine and methionine metabolism	0.0966	0	****	1704	929	775
	map00260	Glycine, serine and threonine metabolism	0.0994	0	****	1697	972	725
	map01212	Fatty acid metabolism	0.0973	0	****	1638	875	763
	map00520	Amino sugar and nucleotide sugar metabolism	0.0951	1e-306	****	1649	932	717
	map00250	Alanine, aspartate and glutamate metabolism	0.0894	2e-302	****	1807	974	833
	map00240	Pyrimidine metabolism	0.0945	2.41806e-275	****	1499	783	716
	map00640	Propanoate metabolism	0.0918	1.74765e-270	****	1546	811	735
	map00020	Citrate cycle (TCA cycle)	0.0866	2.72427e-270	****	1708	939	769
	map00500	Starch and sucrose metabolism	0.1017	8.48823e-269	****	1304	676	628
	map00650	Butanoate metabolism	0.0924	9.42103e-269	****	1520	748	772
	map03070	Bacterial secretion system	0.1077	3.5665e-262	****	1168	593	575
	map00280	Valine, leucine and isoleucine degradation	0.0894	4.05672e-258	****	1543	835	708
	map00680	Methane metabolism	0.0942	1.06432e-254	****	1394	684	710
	map00550	Peptidoglycan biosynthesis	0.107	6.09157e-252	****	1133	691	442
	map01501	beta-Lactam resistance	0.111	2.62469e-233	****	995	575	420
	map01210	2-Oxocarboxylic acid metabolism	0.0908	1.32211e-232	****	1355	721	634
	map00071	Fatty acid degradation	0.0983	6.90558e-232	****	1186	612	574
	map03440	Homologous recombination	0.1007	6.76411e-230	****	1131	689	442
	map03020	RNA polymerase	0.1003	3.4554e-226	****	1121	528	593
	map00030	Pentose phosphate pathway	0.0972	1.40186e-219	****	1142	645	497
	map03430	Mismatch repair	0.1007	1.83785e-217	****	1071	644	427
	map03018	RNA degradation	0.0902	3.21323e-214	****	1262	716	546
	map00330	Arginine and proline metabolism	0.0989	1.34137e-210	****	1067	627	440
	map00910	Nitrogen metabolism	0.0992	9.93901e-201	****	1012	531	481
	map00360	Phenylalanine metabolism	0.1021	5.61682e-200	****	964	528	436
	map03420	Nucleotide excision repair	0.0929	3.44975e-197	****	1106	620	486
	map03030	DNA replication	0.0991	5.03562e-196	****	989	600	389
	map00380	Tryptophan metabolism	0.0949	9.1878e-190	****	1027	574	453
	map00061	Fatty acid biosynthesis	0.0979	2.0604e-189	****	975	537	438
	map00480	Glutathione metabolism	0.1011	2.3071e-183	****	897	525	372
	map00860	Porphyrin metabolism	0.103	5.00326e-173	****	823	461	362
	map00220	Arginine biosynthesis	0.0954	4.19506e-169	****	907	502	405
	map00564	Glycerophospholipid metabolism	0.1112	1.54618e-164	****	699	413	286
	map00362	Benzoate degradation	0.0948	1.68437e-164	****	891	381	510
	map00350	Tyrosine metabolism	0.1067	7.59239e-163	****	734	407	327
	map00770	Pantothenate and CoA biosynthesis	0.0961	6.54509e-162	****	858	442	416
	map00920	Sulfur metabolism	0.0989	4.20602e-156	****	790	442	348
	map02030	Bacterial chemotaxis	0.0978	1.69216e-150	****	775	412	363
	map03410	Base excision repair	0.1019	1.6627e-146	****	707	426	281
	map00790	Folate biosynthesis	0.1043	2.96418e-145	****	677	398	279
	map00760	Nicotinate and nicotinamide metabolism	0.0972	5.71142e-145	****	753	404	349
	map01220	Degradation of aromatic compounds	0.1019	7.29011e-141	****	680	286	394
	map00300	Lysine biosynthesis	0.1015	3.41742e-140	****	680	412	268
	map00400	Phenylalanine, tyrosine and tryptophan biosynthesis	0.099	2.23515e-138	****	698	409	289
	map00052	Galactose metabolism	0.0977	4.29435e-136	****	701	389	312
	map00450	Selenocompound metabolism	0.0913	8.69926e-133	****	765	394	371
	map00290	Valine, leucine and isoleucine biosynthesis	0.0944	2.62124e-132	****	720	368	352
	map00340	Histidine metabolism	0.1016	4.2954e-131	****	635	391	244
	map03060	Protein export	0.0903	1.90581e-130	****	766	413	353
	map01503	Cationic antimicrobial peptide (CAMP) resistance	0.1088	2.33634e-130	****	570	328	242
	map00051	Fructose and mannose metabolism	0.0949	4.10321e-124	****	669	352	317
	map02040	Flagellar assembly	0.1106	3.40606e-123	****	526	282	244
	map00780	Biotin metabolism	0.1043	3.86198e-123	****	573	336	237
	map00541	O-Antigen nucleotide sugar biosynthesis	0.0871	3.05722e-115	****	721	401	320
	map00310	Lysine degradation	0.0881	5.13728e-115	****	704	377	327
	map00130	Ubiquinone and other terpenoid-quinone biosynthesis	0.1095	1.15682e-113	****	492	263	229
	map00670	One carbon pool by folate	0.091	4.40698e-110	****	636	329	307
	map00540	Lipopolysaccharide biosynthesis	0.1085	5.73062e-108	****	473	230	243
	map00410	beta-Alanine metabolism	0.0979	9.0651e-101	****	515	267	248
	map00460	Cyanoamino acid metabolism	0.1071	1.36649e-99	****	444	233	211
	map00561	Glycerolipid metabolism	0.1047	1.37309e-97	****	450	280	170
	map00900	Terpenoid backbone biosynthesis	0.0913	8.99033e-97	****	555	310	245
	map00627	Aminobenzoate degradation	0.0991	2.57973e-89	****	447	196	251
	map00040	Pentose and glucuronate interconversions	0.0958	4.0598e-87	****	460	281	179
	map00521	Streptomycin biosynthesis	0.0953	2.72053e-82	****	438	241	197
	map00730	Thiamine metabolism	0.0933	7.02162e-80	****	440	255	185
	map00511	Other glycan degradation	0.1067	1.0096e-79	****	356	208	148
	map00660	C5-Branched dibasic acid metabolism	0.0897	7.17725e-78	****	459	209	250
	map00261	Monobactam biosynthesis	0.102	1.66132e-75	****	360	223	137
	map00562	Inositol phosphate metabolism	0.0966	1.52679e-71	****	371	212	159
	map00430	Taurine and hypotaurine metabolism	0.0983	4.30371e-66	****	333	184	149
	map04122	Sulfur relay system	0.0933	2.53925e-63	****	347	183	164
	map01502	Vancomycin resistance	0.0996	1.34408e-62	****	308	195	113
	map00053	Ascorbate and aldarate metabolism	0.0931	4.6385e-59	****	324	173	151
	map00625	Chloroalkane and chloroalkene degradation	0.0962	6.83459e-59	****	306	159	147
	map00740	Riboflavin metabolism	0.1102	3.51421e-56	****	237	134	103
	map00750	Vitamin B6 metabolism	0.0995	1.68967e-49	****	242	138	104
	map00903	Limonene degradation	0.104	6.05836e-47	****	214	103	111
	map03450	Non-homologous end-joining	0.0936	1.50932e-46	****	251	136	115
	map00930	Caprolactam degradation	0.1087	8.62796e-45	****	191	84	107
	map00643	Styrene degradation	0.094	5.60707e-44	****	235	123	112
	map00401	Novobiocin biosynthesis	0.1101	2.62572e-40	****	168	99	69
	map00626	Naphthalene degradation	0.1112	9.23072e-39	****	159	83	76
	map00600	Sphingolipid metabolism	0.1008	2.32975e-35	****	167	78	89
	map00523	Polyketide sugar unit biosynthesis	0.09	2.78376e-33	****	189	112	77
	map02025	Biofilm formation - Pseudomonas aeruginosa	0.1155	1.68093e-29	****	113	63	50
	map01040	Biosynthesis of unsaturated fatty acids	0.1118	6.29543e-26	****	103	61	42
	map00361	Chlorocyclohexane and chlorobenzene degradation	0.086	5.54211e-25	****	151	73	78
	map02060	Phosphotransferase system (PTS)	0.0958	3.25477e-24	****	121	77	44
	map01054	Nonribosomal peptide structures	0.1111	1.90497e-22	****	89	55	34
	map00311	Penicillin and cephalosporin biosynthesis	0.0994	2.7561e-18	****	84	41	43
	map05134	Legionellosis	0.0832	4.38252e-18	****	113	55	58
	map00785	Lipoic acid metabolism	0.0981	5.98624e-18	****	84	46	38
	map00624	Polycyclic aromatic hydrocarbon degradation	0.1104	7.21457e-18	****	70	23	47
	map00525	Acarbose and validamycin biosynthesis	0.0874	9.71615e-18	****	101	59	42
	map00720	Carbon fixation pathways in prokaryotes	0.0832	2.33921e-17	****	108	27	81
	map00906	Carotenoid biosynthesis	0.0922	7.12969e-17	****	87	37	50
	map00622	Xylene degradation	0.0987	9.80907e-17	****	77	29	48
	map00984	Steroid degradation	0.1046	7.49995e-14	****	57	31	26
	map00623	Toluene degradation	0.0797	2.86544e-13	****	87	37	50
	map00440	Phosphonate and phosphinate metabolism	0.1049	2.59411e-11	****	45	18	27
	map01059	Biosynthesis of enediyne antibiotics	0.0728	3.20867e-11	****	87	50	37
	map00364	Fluorobenzoate degradation	0.0754	3.64904e-11	****	80	37	43
	map00195	Photosynthesis	0.1622	1.87065e-10	****	24	14	10
	map00592	alpha-Linolenic acid metabolism	0.0897	2.60373e-10	****	52	25	27
	map01057	Biosynthesis of type II polyketide products	0.0966	3.42866e-09	****	40	19	21
	map00565	Ether lipid metabolism	0.1294	5.03069e-09	****	26	13	13
	map04112	Cell cycle - Caulobacter	0.1174	2.10579e-08	****	27	19	8
	map01055	Biosynthesis of vancomycin group antibiotics	0.0932	3.29698e-08	****	37	20	17
	map01052	Type I polyketide structures	0.0849	8.34726e-08	****	41	24	17
	map01053	Biosynthesis of siderophore group nonribosomal peptides	0.0846	1.3128e-07	****	40	19	21
	map00998	Biosynthesis of various antibiotics	0.1045	1.41478e-07	****	28	16	12
	map00791	Atrazine degradation	0.1198	1.55431e-07	****	23	11	12
	map05111	Biofilm formation - Vibrio cholerae	0.1063	1.6492e-07	****	27	10	17
	map00405	Phenazine biosynthesis	0.0837	3.42706e-07	****	38	23	15
	map00621	Dioxin degradation	0.1	5.58467e-07	****	27	9	18
	map00100	Steroid biosynthesis	0.1349	1.17463e-06	****	17	7	10
	map00710	Carbon fixation in photosynthetic organisms	0.07	1.26577e-06	****	50	22	28
	map03050	Proteasome	0.0862	3.05532e-06	****	30	6	24
	map03022	Basal transcription factors	0.1176	1.42683e-05	****	16	2	14
	map00909	Sesquiterpenoid and triterpenoid biosynthesis	0.0962	2.71225e-05	****	20	11	9
	map00253	Tetracycline biosynthesis	0.1275	3.79526e-05	****	13	5	8
	map00590	Arachidonic acid metabolism	0.0881	9.25012e-05	****	20	16	4
	map00332	Carbapenem biosynthesis	0.0703	0.000140957	***	30	15	15
	map04626	Plant-pathogen interaction	0.75	0.000146051	***	3	0	3
	map00633	Nitrotoluene degradation	0.0809	0.000148926	***	22	11	11
	map00997	Biosynthesis of various other secondary metabolites	0.1429	0.00261278	**	6	2	4
	map01051	Biosynthesis of ansamycins	0.0761	0.00280574	**	15	10	5
	map00365	Furfural degradation	0.0887	0.00310031	**	11	3	8
	map00062	Fatty acid elongation	0.0989	0.00348076	**	9	4	5
	map00642	Ethylbenzene degradation	0.0938	0.00496654	**	9	2	7
	map05100	Bacterial invasion of epithelial cells	0.5	0.00642067	**	2	2	0
	map02026	Biofilm formation - Escherichia coli	0.129	0.0191737	*	4	2	2
	map05131	Shigellosis	1	0.0334581	*	1	0	1
	map00601	Glycosphingolipid biosynthesis - lacto and neolacto series	1	0.0334581	*	1	1	0
	map01056	Biosynthesis of type II polyketide backbone	0.1154	0.0549104	ns	3	1	2
	map00333	Prodigiosin biosynthesis	0.0645	0.05728	ns	8	2	6
	map00999	Biosynthesis of various plant secondary metabolites	0.1667	0.059137	ns	2	1	1
	map00591	Linoleic acid metabolism	0.1053	0.131636	ns	2	1	1
	map00571	Lipoarabinomannan (LAM) biosynthesis	0.1	0.143163	ns	2	0	2
	map00572	Arabinogalactan biosynthesis - Mycobacterium	0.1429	0.211966	ns	1	0	1
	map00363	Bisphenol degradation	0.1111	0.263817	ns	1	1	0
	map00522	Biosynthesis of 12-, 14- and 16-membered macrolides	0.1	0.288448	ns	1	1	0
	map00331	Clavulanic acid biosynthesis	0.1	0.288448	ns	1	0	1
	map00121	Secondary bile acid biosynthesis	0.0541	0.35248	ns	2	0	2
	map03015	mRNA surveillance pathway	0.0323	0.651793	ns	1	0	1
						170011	91727	78284
SM/NPK	map01100	Metabolic pathways	0.0989	0	****	33701	19630	14071
	map01110	Biosynthesis of secondary metabolites	0.096	0	****	14578	8647	5931
	map01120	Microbial metabolism in diverse environments	0.0945	0	****	10347	5760	4587
	map01200	Carbon metabolism	0.0903	0	****	5495	3170	2325
	map01230	Biosynthesis of amino acids	0.0931	0	****	5017	2824	2193
	map01240	Biosynthesis of cofactors	0.0996	0	****	5173	3143	2030
	map02020	Two-component system	0.1081	0	****	5448	2843	2605
	map02010	ABC transporters	0.0955	0	****	2932	1359	1573
	map02024	Quorum sensing	0.0957	0	****	2758	1233	1525
	map00190	Oxidative phosphorylation	0.0964	0	****	2697	1518	1179
	map00230	Purine metabolism	0.0962	0	****	2647	1548	1099
	map00620	Pyruvate metabolism	0.0921	0	****	2128	1197	931
	map03010	Ribosome	0.1019	0	****	2222	1309	913
	map00010	Glycolysis / Gluconeogenesis	0.0941	0	****	1940	1136	804
	map00970	Aminoacyl-tRNA biosynthesis	0.0975	0	****	2005	1221	784
	map00520	Amino sugar and nucleotide sugar metabolism	0.1019	0	****	1763	1142	621
	map00250	Alanine, aspartate and glutamate metabolism	0.0918	0	****	1853	1075	778
	map00630	Glyoxylate and dicarboxylate metabolism	0.0865	0	****	2059	1109	950
	map00260	Glycine, serine and threonine metabolism	0.0956	5e-295	****	1629	960	669
	map00500	Starch and sucrose metabolism	0.1061	2.99761e-289	****	1356	816	540
	map01212	Fatty acid metabolism	0.0946	8.51474e-283	****	1590	865	725
	map00550	Peptidoglycan biosynthesis	0.1133	4.30887e-281	****	1198	800	398
	map00270	Cysteine and methionine metabolism	0.0927	1.88288e-280	****	1631	887	744
	map00650	Butanoate metabolism	0.0948	3.63345e-278	****	1557	819	738
	map00240	Pyrimidine metabolism	0.0947	3.24644e-267	****	1498	886	612
	map03070	Bacterial secretion system	0.1094	1.62979e-263	****	1181	577	604
	map00020	Citrate cycle (TCA cycle)	0.087	8.2797e-263	****	1711	990	721
	map03440	Homologous recombination	0.1069	3.13238e-257	****	1193	763	430
	map03430	Mismatch repair	0.107	1.1211e-244	****	1133	739	394
	map00640	Propanoate metabolism	0.0895	4.16497e-243	****	1505	866	639
	map01501	beta-Lactam resistance	0.1141	4.17943e-241	****	1018	652	366
	map03030	DNA replication	0.1089	2.04203e-239	****	1081	675	406
	map00030	Pentose phosphate pathway	0.1009	1.22573e-233	****	1184	747	437
	map00360	Phenylalanine metabolism	0.11	2.0996e-233	****	1038	625	413
	map00680	Methane metabolism	0.092	1.15935e-230	****	1359	707	652
	map00280	Valine, leucine and isoleucine degradation	0.0864	9.50788e-226	****	1490	893	597
	map01210	2-Oxocarboxylic acid metabolism	0.0909	4.09688e-225	****	1355	723	632
	map00071	Fatty acid degradation	0.0961	2.82986e-211	****	1158	620	538
	map00330	Arginine and proline metabolism	0.0997	6.08719e-208	****	1074	614	460
	map03020	RNA polymerase	0.0981	8.87928e-207	****	1095	570	525
	map02030	Bacterial chemotaxis	0.112	4.93551e-205	****	888	490	398
	map03018	RNA degradation	0.09	4.95707e-205	****	1256	730	526
	map03420	Nucleotide excision repair	0.0952	1.96196e-203	****	1132	688	444
	map00380	Tryptophan metabolism	0.0977	4.44259e-198	****	1057	613	444
	map00860	Porphyrin metabolism	0.1081	3.76035e-189	****	862	528	334
	map00910	Nitrogen metabolism	0.0966	6.88373e-181	****	983	545	438
	map00564	Glycerophospholipid metabolism	0.1159	1.91659e-176	****	728	454	274
	map00220	Arginine biosynthesis	0.0977	8.96144e-174	****	927	544	383
	map00061	Fatty acid biosynthesis	0.0952	4.67221e-170	****	946	549	397
	map00480	Glutathione metabolism	0.099	3.06471e-168	****	878	519	359
	map00760	Nicotinate and nicotinamide metabolism	0.1043	9.44136e-168	****	806	481	325
	map00362	Benzoate degradation	0.0957	1.29436e-162	****	897	430	467
	map03410	Base excision repair	0.1071	1.58945e-160	****	741	464	277
	map00052	Galactose metabolism	0.1052	2.70965e-158	****	751	475	276
	map00770	Pantothenate and CoA biosynthesis	0.0954	2.18368e-153	****	850	471	379
	map00350	Tyrosine metabolism	0.1053	1.16106e-152	****	723	395	328
	map03060	Protein export	0.097	3.144e-152	****	820	464	356
	map00920	Sulfur metabolism	0.0988	1.08724e-150	****	788	401	387
	map00541	O-Antigen nucleotide sugar biosynthesis	0.0969	1.52583e-148	****	802	534	268
	map00790	Folate biosynthesis	0.1052	1.14364e-143	****	681	442	239
	map00400	Phenylalanine, tyrosine and tryptophan biosynthesis	0.1017	3.46546e-143	****	715	428	287
	map00300	Lysine biosynthesis	0.1029	2.47394e-140	****	688	424	264
	map01220	Degradation of aromatic compounds	0.1022	3.2205e-137	****	680	338	342
	map01503	Cationic antimicrobial peptide (CAMP) resistance	0.1107	2.08515e-131	****	577	338	239
	map00290	Valine, leucine and isoleucine biosynthesis	0.0944	1.13362e-127	****	719	349	370
	map00051	Fructose and mannose metabolism	0.0965	6.39107e-125	****	678	407	271
	map00340	Histidine metabolism	0.1009	8.09342e-125	****	630	369	261
	map00540	Lipopolysaccharide biosynthesis	0.1153	5.33997e-121	****	501	265	236
	map00450	Selenocompound metabolism	0.088	8.03766e-116	****	737	422	315
	map00310	Lysine degradation	0.0891	2.48525e-114	****	711	409	302
	map00780	Biotin metabolism	0.1025	7.61862e-114	****	560	328	232
	map00670	One carbon pool by folate	0.0926	2.88962e-111	****	646	386	260
	map00900	Terpenoid backbone biosynthesis	0.0968	3.78385e-109	****	588	360	228
	map00130	Ubiquinone and other terpenoid-quinone biosynthesis	0.1085	1.05342e-107	****	486	297	189
	map00040	Pentose and glucuronate interconversions	0.1031	1.73596e-101	****	494	310	184
	map00511	Other glycan degradation	0.1201	1.921e-101	****	396	273	123
	map00561	Glycerolipid metabolism	0.1074	7.60653e-101	****	461	305	156
	map00460	Cyanoamino acid metabolism	0.109	8.89599e-101	****	451	272	179
	map00627	Aminobenzoate degradation	0.1049	6.65355e-100	****	473	237	236
	map02040	Flagellar assembly	0.1024	8.00756e-99	****	486	231	255
	map00521	Streptomycin biosynthesis	0.1021	4.51391e-95	****	469	282	187
	map00410	beta-Alanine metabolism	0.0909	6.99399e-80	****	477	266	211
	map00730	Thiamine metabolism	0.0909	1.04315e-71	****	427	251	176
	map00562	Inositol phosphate metabolism	0.0978	2.12873e-71	****	375	240	135
	map00660	C5-Branched dibasic acid metabolism	0.0877	1.64088e-70	****	448	215	233
	map01502	Vancomycin resistance	0.1	5.41967e-61	****	308	203	105
	map00430	Taurine and hypotaurine metabolism	0.0963	1.08401e-60	****	326	191	135
	map04122	Sulfur relay system	0.0924	2.19839e-59	****	342	195	147
	map03450	Non-homologous end-joining	0.1022	1.47534e-56	****	275	170	105
	map00053	Ascorbate and aldarate metabolism	0.0925	5.66526e-56	****	321	177	144
	map00261	Monobactam biosynthesis	0.09	9.65921e-53	****	317	203	114
	map00643	Styrene degradation	0.0993	6.16083e-49	****	248	140	108
	map00401	Novobiocin biosynthesis	0.1207	2.29102e-48	****	184	114	70
	map00523	Polyketide sugar unit biosynthesis	0.1057	2.39599e-48	****	222	139	83
	map00361	Chlorocyclohexane and chlorobenzene degradation	0.1121	1.39578e-46	****	196	104	92
	map00750	Vitamin B6 metabolism	0.0967	2.28004e-44	****	234	149	85
	map00625	Chloroalkane and chloroalkene degradation	0.0873	6.46111e-44	****	277	165	112
	map00740	Riboflavin metabolism	0.1003	2.49819e-43	****	215	150	65
	map00600	Sphingolipid metabolism	0.1087	1.677e-40	****	177	104	73
	map02060	Phosphotransferase system (PTS)	0.1172	8.42178e-38	****	148	101	47
	map00903	Limonene degradation	0.0936	6.82922e-35	****	192	102	90
	map00930	Caprolactam degradation	0.0974	2.52575e-33	****	171	85	86
	map00623	Toluene degradation	0.1157	6.50898e-32	****	126	58	68
	map01054	Nonribosomal peptide structures	0.1239	9.66619e-28	****	99	73	26
	map01059	Biosynthesis of enediyne antibiotics	0.1039	4.26719e-27	****	124	77	47
	map02025	Biofilm formation - Pseudomonas aeruginosa	0.1126	4.30795e-27	****	110	57	53
	map00311	Penicillin and cephalosporin biosynthesis	0.1174	6.10144e-26	****	99	63	36
	map00525	Acarbose and validamycin biosynthesis	0.1018	3.89351e-25	****	118	70	48
	map00626	Naphthalene degradation	0.091	4.21686e-23	****	130	70	60
	map00906	Carotenoid biosynthesis	0.0999	8.08821e-20	****	94	46	48
	map00622	Xylene degradation	0.1067	2.05703e-19	****	83	38	45
	map00364	Fluorobenzoate degradation	0.0948	2.22206e-19	****	100	46	54
	map00785	Lipoic acid metabolism	0.0994	5.88406e-18	****	85	48	37
	map00720	Carbon fixation pathways in prokaryotes	0.0833	8.49017e-17	****	108	40	68
	map00710	Carbon fixation in photosynthetic organisms	0.1024	2.52369e-16	****	73	35	38
	map01040	Biosynthesis of unsaturated fatty acids	0.0922	5.04246e-16	****	85	48	37
	map01055	Biosynthesis of vancomycin group antibiotics	0.1263	3.67311e-15	****	50	33	17
	map00624	Polycyclic aromatic hydrocarbon degradation	0.1025	9.62051e-15	****	65	18	47
	map00984	Steroid degradation	0.1079	1.74193e-14	****	59	44	15
	map01057	Biosynthesis of type II polyketide products	0.1205	2.34715e-14	****	50	27	23
	map00565	Ether lipid metabolism	0.1592	5.68944e-13	****	32	18	14
	map00440	Phosphonate and phosphinate metabolism	0.109	4.95783e-12	****	47	23	24
	map05134	Legionellosis	0.0679	9.16538e-10	****	92	50	42
	map00633	Nitrotoluene degradation	0.1194	1.19238e-09	****	32	16	16
	map00195	Photosynthesis	0.161	2.18718e-08	****	19	14	5
	map05111	Biofilm formation - Vibrio cholerae	0.1107	6.42057e-08	****	28	10	18
	map00590	Arachidonic acid metabolism	0.1101	3.4608e-07	****	25	16	9
	map00998	Biosynthesis of various antibiotics	0.1004	7.70098e-07	****	27	20	7
	map01052	Type I polyketide structures	0.0785	2.61716e-06	****	38	28	10
	map00332	Carbapenem biosynthesis	0.0804	5.15151e-06	****	34	17	17
	map04112	Cell cycle - Caulobacter	0.1	5.16836e-06	****	23	14	9
	map00592	alpha-Linolenic acid metabolism	0.0724	6.14355e-06	****	42	22	20
	map00791	Atrazine degradation	0.1042	1.13111e-05	****	20	8	12
	map00405	Phenazine biosynthesis	0.0754	1.96365e-05	****	34	22	12
	map00642	Ethylbenzene degradation	0.1354	2.44695e-05	****	13	5	8
	map00100	Steroid biosynthesis	0.119	2.87604e-05	****	15	8	7
	map03050	Proteasome	0.0802	3.41877e-05	****	28	14	14
	map00253	Tetracycline biosynthesis	0.1262	5.19889e-05	****	13	8	5
	map04626	Plant-pathogen interaction	0.75	0.000155367	***	3	0	3
	map03015	mRNA surveillance pathway	0.1935	0.00055984	***	6	3	3
	map03022	Basal transcription factors	0.0956	0.000830704	***	13	4	9
	map00621	Dioxin degradation	0.0743	0.00107772	**	20	9	11
	map01053	Biosynthesis of siderophore group nonribosomal peptides	0.0633	0.00109492	**	30	17	13
	map00997	Biosynthesis of various other secondary metabolites	0.1463	0.00255542	**	6	2	4
	map01051	Biosynthesis of ansamycins	0.0711	0.00822647	**	14	12	2
	map01056	Biosynthesis of type II polyketide backbone	0.1481	0.0127455	*	4	4	0
	map00062	Fatty acid elongation	0.0879	0.0127881	*	8	4	4
	map00333	Prodigiosin biosynthesis	0.0726	0.0268477	*	9	6	3
	map00524	Neomycin, kanamycin and gentamicin biosynthesis	0.25	0.0284858	*	2	0	2
	map05131	Shigellosis	1	0.034161	*	1	0	1
	map00909	Sesquiterpenoid and triterpenoid biosynthesis	0.058	0.0534369	ns	12	9	3
	map00365	Furfural degradation	0.0645	0.063065	ns	8	2	6
	map00404	Staurosporine biosynthesis	0.3333	0.099022	ns	1	0	1
	map05100	Bacterial invasion of epithelial cells	0.25	0.1298	ns	1	0	1
	map00232	Caffeine metabolism	0.25	0.1298	ns	1	0	1
	map00572	Arabinogalactan biosynthesis - Mycobacterium	0.1429	0.21597	ns	1	1	0
	map00196	Photosynthesis - antenna proteins	0.125	0.242753	ns	1	1	0
	map00363	Bisphenol degradation	0.1111	0.268621	ns	1	1	0
	map02026	Biofilm formation - Escherichia coli	0.0645	0.286276	ns	2	0	2
	map00522	Biosynthesis of 12-, 14- and 16-membered macrolides	0.1	0.293606	ns	1	1	0
	map00999	Biosynthesis of various plant secondary metabolites	0.0833	0.341044	ns	1	0	1
	map00591	Linoleic acid metabolism	0.0526	0.48336	ns	1	1	0
	map00121	Secondary bile acid biosynthesis	0.0286	0.703749	ns	1	1	0
						171707	98651	73056

## Sheet: Supplementary Table 9
Table S9. Gene Ontology (GO) term enrichment analysis of DEGs in foxtail millet rhizosphere soil under different fertilization conditions.
Group	Category	GO ID	Description	log2FC	Regulation	p Value	qValue	Significance
CM/NPK	MF	GO:0003674	lignostilbene alpha beta-dioxygenase activity	1.02	up	0.049535	0.136012	yes
	MF	GO:0003674	phosphoacetylglucosamine mutase activity	-1.03	down	0.049535	0.136012	yes
	BP	GO:0008150	SRP-dependent cotranslational protein targeting to membrane	-1.01	down	0.049535	0.136012	yes
	CC	GO:0005575	zona pellucida receptor complex	-1.04	down	0.049535	0.136012	yes
	CC	GO:0005575	tRNA-intron endonuclease complex	-1.18	down	0.049535	0.136012	yes
	MF	GO:0003674	tRNA-intron endonuclease activity	-1.26	down	0.049535	0.136012	yes
	BP	GO:0008150	tRNA-type intron splice site recognition and cleavage	-1.26	down	0.049535	0.136012	yes
	CC	GO:0005575	eukaryotic 43S preinitiation complex	-1.03	down	0.049535	0.136012	yes
	BP	GO:0008150	rRNA pseudouridine synthesis	-1.04	down	0.049535	0.136012	yes
	BP	GO:0008150	box H/ACA snoRNA 3'-end processing	-1.05	down	0.049535	0.136012	yes
	BP	GO:0008150	snRNA pseudouridine synthesis	-1.05	down	0.049535	0.136012	yes
	CC	GO:0005575	box H/ACA snoRNP complex	-1.05	down	0.049535	0.136012	yes
	MF	GO:0003674	dolichyl-diphosphooligosaccharide-protein glycotransferase activity	-1.07	down	0.049535	0.136012	yes
	CC	GO:0005575	oligosaccharyltransferase complex	-1.07	down	0.049535	0.136012	yes
	CC	GO:0005575	proteasome core complex	-1.05	down	0.049535	0.136012	yes
	BP	GO:0008150	peptidyl-lysine modification to peptidyl-hypusine	-1.11	down	0.049535	0.136012	yes
	MF	GO:0003674	beta-tubulin binding	-1.28	down	0.049535	0.136012	yes
	CC	GO:0005575	replication fork protection complex	-1.04	down	0.049535	0.136012	yes
	MF	GO:0003674	deoxyhypusine synthase activity	-1.07	down	0.049535	0.136012	yes
	MF	GO:0003674	G-protein beta-subunit binding	-1.32	down	0.049535	0.136012	yes
	CC	GO:0005575	U2 snRNP	-1.03	down	0.049535	0.136012	yes
	BP	GO:0008150	endonucleolytic cleavage in ITS1 to separate SSU-rRNA from 5.8S rRNA and LSU-rRNA from tricistronic rRNA transcript (SSU-rRNA, 5.8S rRNA, LSU-rRNA)	-1.04	down	0.049535	0.136012	yes
	BP	GO:0008150	endonucleolytic cleavage to generate mature 3'-end of SSU-rRNA from (SSU-rRNA, 5.8S rRNA, LSU-rRNA)	-1.08	down	0.049535	0.136012	yes
	CC	GO:0005575	viral assembly intermediate	-1.51	down	0.049535	0.136012	yes
	MF	GO:0003674	bis(5'-nucleosyl)-tetraphosphatase (asymmetrical) activity	-1.09	down	0.049535	0.136012	yes
	CC	GO:0005575	signal recognition particle receptor complex	-1.03	down	0.049535	0.136012	yes
	MF	GO:0003674	CDP reductase activity	1.12	up	0.049535	0.136012	yes
	MF	GO:0003674	NADP phosphatase activity	-1.2	down	0.049535	0.136012	yes
	MF	GO:0003674	rRNA (pseudouridine) methyltransferase activity	-1.03	down	0.049535	0.136012	yes
	BP	GO:0008150	positive regulation of protein localization to Cajal body	-1.23	down	0.049535	0.136012	yes
	BP	GO:0008150	positive regulation of telomerase RNA localization to Cajal body	-1.23	down	0.049535	0.136012	yes
	BP	GO:0008150	premeiotic DNA replication	-1.05	down	0.049535	0.136012	yes
	MF	GO:0003674	3'-5' DNA helicase activity	-1.2	down	0.049535	0.136012	yes
	BP	GO:0008150	mitotic DNA replication initiation	-1.13	down	0.049535	0.136012	yes
	BP	GO:0008150	response to ethylene	-1.05	down	0.049535	0.136012	yes
	BP	GO:0008150	tRNA wobble cytosine modification	-1.33	down	0.049535	0.136012	yes
	BP	GO:0008150	axon midline choice point recognition	-1.16	down	0.049535	0.136012	yes
	MF	GO:0003674	histone serine kinase activity	-1.01	down	0.049535	0.136012	yes
	CC	GO:0005575	U1 snRNP	-1.48	down	0.049535	0.136012	yes
	BP	GO:0008150	negative regulation of glycogen biosynthetic process	1.01	up	0.049535	0.136012	yes
	BP	GO:0008150	synthesis of RNA primer involved in mitotic DNA replication	-1.21	down	0.049535	0.136012	yes
	BP	GO:0008150	negative regulation of TOR signaling	-1	down	0.049535	0.136012	yes
	BP	GO:0008150	synapsis	-1.16	down	0.049535	0.136012	yes
	BP	GO:0008150	nematode larval development	-1.04	down	0.049535	0.136012	yes
	BP	GO:0008150	axonogenesis	-1.01	down	0.049535	0.136012	yes
	CC	GO:0005575	eukaryotic translation initiation factor 2 complex	-1.15	down	0.049535	0.136012	yes
	BP	GO:0008150	neutrophil homeostasis	-1.19	down	0.049535	0.136012	yes
	BP	GO:0008150	provirus excision	-1.17	down	0.049535	0.136012	yes
	BP	GO:0008150	chiasma assembly	-1.09	down	0.049535	0.136012	yes
	BP	GO:0008150	maintenance of meiotic sister chromatid cohesion	-1.1	down	0.049535	0.136012	yes
	BP	GO:0008150	positive regulation of establishment of protein localization to telomere	-1.23	down	0.049535	0.136012	yes
	MF	GO:0003674	ATP-dependent four-way junction helicase activity	-1.32	down	0.049535	0.136012	yes
	MF	GO:0003674	glycerol-1-phosphate dehydrogenase [NAD(P)+] activity	-1.2	down	0.049535	0.136012	yes
	MF	GO:0003674	urea transmembrane transporter activity	-1.6	down	0.049535	0.136012	yes
	BP	GO:0008150	drug metabolic process	-1.03	down	0.049535	0.136012	yes
	BP	GO:0008150	cleavage involved in rRNA processing	-1.09	down	0.049535	0.136012	yes
	MF	GO:0003674	high-affinity nickel cation transmembrane transporter activity	-1.05	down	0.049535	0.136012	yes
	BP	GO:0008150	nickel cation import across plasma membrane	-1.05	down	0.049535	0.136012	yes
	CC	GO:0005575	U5 snRNP	-1.47	down	0.049535	0.136012	yes
	MF	GO:0003674	maltodextrin transmembrane transporter activity	-1.97	down	0.049535	0.136012	yes
	BP	GO:0008150	meiotic strand displacement involved in double-strand break repair via SDSA	-1.3	down	0.049535	0.136012	yes
	CC	GO:0005575	U4/U6 x U5 tri-snRNP complex	-1.45	down	0.049535	0.136012	yes
	CC	GO:0005575	tRNA-splicing ligase complex	-1.44	down	0.049535	0.136012	yes
	BP	GO:0008150	animal organ regeneration	-1.43	down	0.049535	0.136012	yes
	BP	GO:0008150	protein targeting to ER	-1.54	down	0.049535	0.136012	yes
	MF	GO:0003674	deoxynucleotide 3'-phosphatase activity	-3.2	down	0.049535	0.136012	yes
	CC	GO:0005575	small nucleolar ribonucleoprotein complex	-1.57	down	0.049535	0.136012	yes
	BP	GO:0008150	mitochondrial DNA metabolic process	3.95	up	0.049535	0.136012	yes
	BP	GO:0008150	telomere maintenance	1.1	up	0.049535	0.136012	yes
	MF	GO:0003674	LPPG:FO 2-phospho-L-lactate transferase activity	-1.06	down	0.049535	0.136012	yes
	BP	GO:0008150	inner mitochondrial membrane organization	-1.33	down	0.049535	0.136012	yes
	MF	GO:0003674	oxidoreductase activity, acting on the CH-NH2 group of donors	1.08	up	0.049535	0.136012	yes
	BP	GO:0008150	regulation of response to interferon-gamma	-1.68	down	0.049535	0.136012	yes
	BP	GO:0008150	regulation of RNA splicing	-1.08	down	0.049535	0.136012	yes
	MF	GO:0003674	ATP-dependent DNA/RNA helicase activity	1.15	up	0.049535	0.136012	yes
	BP	GO:0008150	embryo development	-1	down	0.049535	0.136012	yes
	BP	GO:0008150	autophagy of mitochondrion	2.32	up	0.049535	0.136012	yes
	BP	GO:0008150	protein desumoylation	-1.61	down	0.049535	0.136012	yes
	MF	GO:0003674	SUMO-specific protease activity	-1.61	down	0.049535	0.136012	yes
	MF	GO:0003674	catechol O-methyltransferase activity	-1.26	down	0.049535	0.136012	yes
	BP	GO:0008150	negative regulation of mitotic recombination	-1.51	down	0.049535	0.136012	yes
	BP	GO:0008150	S-adenosylmethionine catabolic process	-1.42	down	0.049535	0.136012	yes
	BP	GO:0008150	pentalenolactone biosynthetic process	1.03	up	0.049535	0.136012	yes
	BP	GO:0008150	endoplasmic reticulum organization	-1.07	down	0.049535	0.136012	yes
	MF	GO:0003674	chitin deacetylase activity	1.26	up	0.049535	0.136012	yes
	BP	GO:0008150	mitotic DNA integrity checkpoint	Inf	up	0.036904	0.136012	yes
	BP	GO:0008150	homologous recombination	-1.57	down	0.049535	0.136012	yes
	BP	GO:0008150	double-strand break repair via synthesis-dependent strand annealing	-1.57	down	0.049535	0.136012	yes
	BP	GO:0008150	regulation of carbohydrate utilization	1.39	up	0.049535	0.136012	yes
	BP	GO:0008150	regulation of pharyngeal pumping	-1.15	down	0.049535	0.136012	yes
	BP	GO:0008150	neuron migration	-1.23	down	0.049535	0.136012	yes
	BP	GO:0008150	negative regulation of dendrite development	-1.23	down	0.049535	0.136012	yes
	BP	GO:0008150	isoleucine transport	-1.09	down	0.049535	0.136012	yes
	BP	GO:0008150	valine transport	-1.09	down	0.049535	0.136012	yes
	BP	GO:0008150	mitotic DNA replication maintenance of fidelity	1.6	up	0.049535	0.136012	yes
	BP	GO:0008150	nucleotide-excision repair, DNA gap filling	1.12	up	0.049535	0.136012	yes
	CC	GO:0005575	retrotransposon nucleocapsid	-3.77	down	0.049535	0.136012	yes
	MF	GO:0003674	glycoside-pentoside-hexuronide:cation symporter activity	1.13	up	0.049535	0.136012	yes
	BP	GO:0008150	regulation of nucleotide biosynthetic process	1.09	up	0.049535	0.136012	yes
	MF	GO:0003674	[formate-C-acetyltransferase]-activating enzyme activity	1.18	up	0.049535	0.136012	yes
	MF	GO:0003674	mRNA 3'-UTR AU-rich region binding	-1.93	down	0.049535	0.136012	yes
	BP	GO:0008150	response to gamma radiation	-1.05	down	0.049535	0.136012	yes
	MF	GO:0003674	alpha-tubulin binding	-1.34	down	0.049535	0.136012	yes
	CC	GO:0005575	cytosolic tRNA wobble base thiouridylase complex	-1.46	down	0.049535	0.136012	yes
	CC	GO:0005575	polytene chromosome puff	-1.15	down	0.049535	0.136012	yes
	CC	GO:0005575	phagophore assembly site	1.5	up	0.049535	0.136012	yes
	MF	GO:0003674	RNA polymerase II proximal promoter sequence-specific DNA binding	-1.23	down	0.049535	0.136012	yes
	BP	GO:0008150	maintenance of DNA repeat elements	1.16	up	0.049535	0.136012	yes
	BP	GO:0008150	regulation of systemic arterial blood pressure	1.5	up	0.049535	0.136012	yes
	BP	GO:0008150	RNA polymerase II transcriptional preinitiation complex assembly	-1.38	down	0.049535	0.136012	yes
	BP	GO:0008150	microtubule severing	-1.47	down	0.049535	0.136012	yes
	BP	GO:0008150	cellular response to sucrose stimulus	1.42	up	0.049535	0.136012	yes
	BP	GO:0008150	dCDP biosynthetic process	1.33	up	0.049535	0.136012	yes
	BP	GO:0008150	CDP metabolic process	1.33	up	0.049535	0.136012	yes
	BP	GO:0008150	microtubule bundle formation	-1.46	down	0.049535	0.136012	yes
	MF	GO:0003674	RNA polymerase II core binding	-1.47	down	0.049535	0.136012	yes
	MF	GO:0003674	taurine:sodium symporter activity	1.19	up	0.049535	0.136012	yes
	BP	GO:0008150	lateral root development	-1.97	down	0.049535	0.136012	yes
	CC	GO:0005575	mitochondrial prohibitin complex	-1.25	down	0.049535	0.136012	yes
	MF	GO:0003674	single base insertion or deletion binding	1.36	up	0.049535	0.136012	yes
	CC	GO:0005575	MutSalpha complex	1.36	up	0.049535	0.136012	yes
	CC	GO:0005575	postsynaptic density	-1.53	down	0.049535	0.136012	yes
	BP	GO:0008150	positive regulation of cytokine production	1.12	up	0.049535	0.136012	yes
	BP	GO:0008150	exit from mitosis	-1.32	down	0.049535	0.136012	yes
	BP	GO:0008150	axonal transport of mitochondrion	-1.32	down	0.049535	0.136012	yes
	BP	GO:0008150	positive regulation of microtubule depolymerization	-1.32	down	0.049535	0.136012	yes
	BP	GO:0008150	nuclear envelope reassembly	-1.32	down	0.049535	0.136012	yes
	BP	GO:0008150	cytokinetic process	-1.32	down	0.049535	0.136012	yes
	BP	GO:0008150	membrane fission	-1.32	down	0.049535	0.136012	yes
	BP	GO:0008150	transcriptional open complex formation at RNA polymerase II promoter	-1.55	down	0.049535	0.136012	yes
	BP	GO:0008150	DNA-dependent DNA replication maintenance of fidelity	1.78	up	0.049535	0.136012	yes
	BP	GO:0008150	glycophagy	1.69	up	0.049535	0.136012	yes
	CC	GO:0005575	hyphal tip	1.89	up	0.049535	0.136012	yes
	BP	GO:0008150	DNA replication, Okazaki fragment processing	-1.4	down	0.049535	0.136012	yes
	BP	GO:0008150	donor selection	-1.4	down	0.049535	0.136012	yes
	MF	GO:0003674	DNA/RNA helicase activity	-1.4	down	0.049535	0.136012	yes
	MF	GO:0003674	flap-structured DNA binding	-1.4	down	0.049535	0.136012	yes
	CC	GO:0005575	nuclear condensin complex	-1.3	down	0.049535	0.136012	yes
	BP	GO:0008150	mitotic chromosome condensation	-1.3	down	0.049535	0.136012	yes
	MF	GO:0003674	carbon dioxide binding	-1.01	down	0.049535	0.136012	yes
	BP	GO:0008150	positive regulation of transcription from RNA polymerase II promoter in response to oxidative stress	-1.05	down	0.049535	0.136012	yes
	CC	GO:0005575	RNA polymerase II transcription factor complex	-1.05	down	0.049535	0.136012	yes
	BP	GO:0008150	positive regulation of induction of conjugation with cellular fusion by regulation of transcription from RNA polymerase II promoter	-1.05	down	0.049535	0.136012	yes
	BP	GO:0008150	actin filament polymerization	1.26	up	0.049535	0.136012	yes
	BP	GO:0008150	Okazaki fragment processing involved in mitotic DNA replication	-1.03	down	0.049535	0.136012	yes
	BP	GO:0008150	cell-matrix adhesion	-1.25	down	0.049535	0.136012	yes
	BP	GO:0008150	C-terminal protein lipidation	2.27	up	0.049535	0.136012	yes
	BP	GO:0008150	negative regulation of interferon-gamma-mediated signaling pathway	1.1	up	0.049535	0.136012	yes
	MF	GO:0003674	propionyl-CoA:succinate CoA-transferase activity	1.22	up	0.049535	0.136012	yes
	MF	GO:0003674	DNA (cytosine-5-)-methyltransferase activity	1.19	up	0.049535	0.136012	yes
	BP	GO:0008150	ribose phosphate metabolic process	-1.76	down	0.049535	0.136012	yes
	CC	GO:0005575	mitochondrial inner boundary membrane	-1.49	down	0.049535	0.136012	yes
	BP	GO:0008150	tyrosine biosynthetic process from chorismate via 4-hydroxyphenylpyruvate	-1.62	down	0.049535	0.136012	yes
	MF	GO:0003674	L-leucine:2-oxoglutarate aminotransferase activity	-1.62	down	0.049535	0.136012	yes
	BP	GO:0008150	positive regulation of tyrosine phosphorylation of STAT protein	1.08	up	0.049535	0.136012	yes
	BP	GO:0008150	negative regulation of tyrosine phosphorylation of STAT protein	1.08	up	0.049535	0.136012	yes
	BP	GO:0008150	protein poly-ADP-ribosylation	1.08	up	0.049535	0.136012	yes
	BP	GO:0008150	positive regulation of interleukin-4-mediated signaling pathway	1.08	up	0.049535	0.136012	yes
	BP	GO:0008150	response to morphine	1.01	up	0.049535	0.136012	yes
	BP	GO:0008150	sterol catabolic process	-1.56	down	0.049535	0.136012	yes
	BP	GO:0008150	inositol lipid-mediated signaling	1.11	up	0.049535	0.136012	yes
	BP	GO:0008150	positive regulation of glycogen catabolic process	1.31	up	0.049535	0.136012	yes
	BP	GO:0008150	leukotriene metabolic process	1.22	up	0.049535	0.136012	yes
	MF	GO:0003674	amide binding	-1.49	down	0.049535	0.136012	yes
	MF	GO:0003674	MutSalpha complex binding	1.22	up	0.049535	0.136012	yes
	BP	GO:0008150	muscle organ development	1.15	up	0.049535	0.136012	yes
	MF	GO:0003674	ATP-dependent 5'-3' DNA/RNA helicase activity	1.3	up	0.049535	0.136012	yes
	CC	GO:0005575	Nrd1 complex	1.3	up	0.049535	0.136012	yes
	BP	GO:0008150	regulation of transcription from RNA polymerase II promoter in response to DNA damage	1.3	up	0.049535	0.136012	yes
	BP	GO:0008150	cell chemotaxis	-1.2	down	0.049535	0.136012	yes
	MF	GO:0003674	PDZ domain binding	1.76	up	0.049535	0.136012	yes
	BP	GO:0008150	negative regulation of proteasomal ubiquitin-dependent protein catabolic process	2.23	up	0.049535	0.136012	yes
	MF	GO:0003674	protein-DNA unloading ATPase activity	2.23	up	0.049535	0.136012	yes
	BP	GO:0008150	anterior lateral line development	1.01	up	0.049535	0.136012	yes
	BP	GO:0008150	posterior lateral line neuromast development	1.01	up	0.049535	0.136012	yes
	BP	GO:0008150	mature ribosome assembly	-1.19	down	0.049535	0.136012	yes
	BP	GO:0008150	positive regulation of brood size	-1.41	down	0.049535	0.136012	yes
	BP	GO:0008150	glucose 6-phosphate metabolic process	1.06	up	0.049535	0.136012	yes
	BP	GO:0008150	regulation of transcription from RNA polymerase II promoter in response to oxidative stress	-1.12	down	0.049535	0.136012	yes
	BP	GO:0008150	positive regulation of transcription from RNA polymerase II promoter in response to heat stress	-1.12	down	0.049535	0.136012	yes
	BP	GO:0008150	regulation of conjugation with cellular fusion by regulation of transcription from RNA polymerase II promoter	-1.12	down	0.049535	0.136012	yes
	MF	GO:0003674	exodeoxyribonuclease I activity	1.34	up	0.049535	0.136012	yes
	BP	GO:0008150	regulation of glycolytic process	1.05	up	0.049535	0.136012	yes
	BP	GO:0008150	mRNA modification	1.39	up	0.049535	0.136012	yes
	MF	GO:0003674	geranoyl-CoA carboxylase activity	-1.06	down	0.049535	0.136012	yes
	MF	GO:0003674	UDP-sugar diphosphatase activity	-1.01	down	0.049535	0.136012	yes
	MF	GO:0003674	inorganic anion exchanger activity	-1.49	down	0.049535	0.136012	yes
	MF	GO:0003674	electron transporter, transferring electrons within the cyclic electron transport pathway of photosynthesis activity	1.11	up	0.049535	0.136012	yes
	MF	GO:0003674	electron transporter, transferring electrons within the noncyclic electron transport pathway of photosynthesis activity	1.11	up	0.049535	0.136012	yes
	CC	GO:0005575	fusome	-1.12	down	0.049535	0.136012	yes
	BP	GO:0008150	sister chromatid segregation	Inf	up	0.036904	0.136012	yes
	CC	GO:0005575	viral capsid	-1.72	down	0.049535	0.136012	yes
	BP	GO:0008150	base-excision repair, gap-filling	2.07	up	0.049535	0.136012	yes
	BP	GO:0008150	late nucleophagy	Inf	up	0.036904	0.136012	yes
	MF	GO:0003674	maltose transmembrane transporter activity	-1.53	down	0.049535	0.136012	yes
	MF	GO:0003674	DNA/DNA annealing activity	-1.23	down	0.049535	0.136012	yes
	BP	GO:0008150	dicarboxylic acid catabolic process	1.52	up	0.049535	0.136012	yes
	BP	GO:0008150	cadaverine transport	1.35	up	0.049535	0.136012	yes
	BP	GO:0008150	tRNA gene clustering	-1.75	down	0.049535	0.136012	yes
	BP	GO:0008150	rDNA condensation	-1.75	down	0.049535	0.136012	yes
	CC	GO:0005575	lamellipodium membrane	-1.37	down	0.049535	0.136012	yes
	MF	GO:0003674	Y-form DNA binding	1.2	up	0.049535	0.136012	yes
	BP	GO:0008150	cellular lactam catabolic process	1.34	up	0.049535	0.136012	yes
	BP	GO:0008150	dorsal closure	-1.47	down	0.049535	0.136012	yes
	CC	GO:0005575	prospore membrane	1.4	up	0.049535	0.136012	yes
	MF	GO:0003674	protein C-terminal S-isoprenylcysteine carboxyl O-methyltransferase activity	1.29	up	0.049535	0.136012	yes
	BP	GO:0008150	protein exit from endoplasmic reticulum	1.69	up	0.049535	0.136012	yes
	BP	GO:0008150	autophagy of nucleus	Inf	up	0.036904	0.136012	yes
	BP	GO:0008150	ceramide biosynthetic process	2.05	up	0.049535	0.136012	yes
	BP	GO:0008150	negative regulation of chloride transport	-2.26	down	0.049535	0.136012	yes
	MF	GO:0003674	oxidoreductase activity, acting on the CH-CH group of donors, iron-sulfur protein as acceptor	1.73	up	0.049535	0.136012	yes
	BP	GO:0008150	regulation of spore germination	1.31	up	0.049535	0.136012	yes
	BP	GO:0008150	negative regulation of protein serine/threonine kinase activity	1.03	up	0.049535	0.136012	yes
	BP	GO:0008150	regulation of beta-lactamase activity	1.44	up	0.049535	0.136012	yes
	BP	GO:0008150	clearance of foreign intracellular DNA	1.25	up	0.049535	0.136012	yes
	MF	GO:0003674	heteroduplex DNA loop binding	1.73	up	0.049535	0.136012	yes
	MF	GO:0003674	double-strand/single-strand DNA junction binding	1.73	up	0.049535	0.136012	yes
	CC	GO:0005575	MutSbeta complex	1.73	up	0.049535	0.136012	yes
	CC	GO:0005575	PHA granule	1.32	up	0.049535	0.136012	yes
	BP	GO:0008150	scaRNA localization to Cajal body	-1.07	down	0.049535	0.136012	yes
	BP	GO:0008150	7-methylguanosine mRNA capping	Inf	up	0.036904	0.136012	yes
	BP	GO:0008150	lipoprotein biosynthetic process via signal peptide cleavage	1.12	up	0.049535	0.136012	yes
	BP	GO:0008150	meiotic gene conversion	2.37	up	0.049535	0.136012	yes
	CC	GO:0005575	axon terminus	-1.58	down	0.049535	0.136012	yes
	MF	GO:0003674	glutamine-phenylpyruvate transaminase activity	1.23	up	0.049535	0.136012	yes
	BP	GO:0008150	detection of maltose stimulus	-1.88	down	0.049535	0.136012	yes
	MF	GO:0003674	maltose binding	-1.88	down	0.049535	0.136012	yes
	MF	GO:0003674	succinyltransferase activity	1.41	up	0.049535	0.136012	yes
	BP	GO:0008150	embryonic digestive tract morphogenesis	-1.73	down	0.049535	0.136012	yes
	BP	GO:0008150	entry into host cell	-1.48	down	0.049535	0.136012	yes
	MF	GO:0003674	carbazole 1,9a-dioxygenase activity	1.81	up	0.049535	0.136012	yes
	MF	GO:0003674	5-phosphoribosyl 1-pyrophosphate pyrophosphatase activity	-1.73	down	0.049535	0.136012	yes
	CC	GO:0005575	chloroplast intermembrane space	1.35	up	0.049535	0.136012	yes
	BP	GO:0008150	immune system process	1.34	up	0.049535	0.136012	yes
	BP	GO:0008150	L-cysteine catabolic process to pyruvate	1.12	up	0.049535	0.136012	yes
	CC	GO:0005575	voltage-gated potassium channel complex	-1.71	down	0.049535	0.136012	yes
	MF	GO:0003674	glucan exo-1,3-beta-glucosidase activity	-1.22	down	0.049535	0.136012	yes
	BP	GO:0008150	positive regulation of growth of symbiont in host	1.02	up	0.049535	0.136012	yes
	BP	GO:0008150	negative regulation of growth of symbiont in host	1.02	up	0.049535	0.136012	yes
	MF	GO:0003674	raffinose alpha-galactosidase activity	-1.1	down	0.049535	0.136012	yes
	BP	GO:0008150	cellular protein localization	1.8	up	0.049535	0.136012	yes
	MF	GO:0003674	chitin synthase activity	Inf	up	0.036904	0.136012	yes
	BP	GO:0008150	cell tip growth	Inf	up	0.036904	0.136012	yes
	CC	GO:0005575	myosin complex	Inf	up	0.036904	0.136012	yes
	CC	GO:0005575	recycling endosome membrane	-1.12	down	0.049535	0.136012	yes
	BP	GO:0008150	negative regulation of autophagy	-1.05	down	0.049535	0.136012	yes
	MF	GO:0003674	lipopolysaccharide binding	-1.25	down	0.049535	0.136012	yes
	BP	GO:0008150	viral capsid assembly	-4.62	down	0.046302	0.136012	yes
	CC	GO:0005575	juxtaparanode region of axon	-1.6	down	0.049535	0.136012	yes
	BP	GO:0008150	mycolate cell wall layer assembly	1.52	up	0.049535	0.136012	yes
	MF	GO:0003674	cholesterol 24-hydroxylase activity	1.13	up	0.049535	0.136012	yes
	CC	GO:0005575	translation release factor complex	2.02	up	0.049535	0.136012	yes
	BP	GO:0008150	photosystem II assembly	1.17	up	0.049535	0.136012	yes
	BP	GO:0008150	peroxisome fission	1.43	up	0.049535	0.136012	yes
	BP	GO:0008150	regulation of cardiac muscle contraction by regulation of the release of sequestered calcium ion	-1.36	down	0.049535	0.136012	yes
	BP	GO:0008150	homogentisate catabolic process	1.03	up	0.049535	0.136012	yes
	MF	GO:0003674	ferrichrome transmembrane transporter activity	1.37	up	0.049535	0.136012	yes
	BP	GO:0008150	maintenance of CRISPR repeat elements	-2.5	down	0.049535	0.136012	yes
	CC	GO:0005575	nuclear subtelomeric heterochromatin	-1.07	down	0.049535	0.136012	yes
	MF	GO:0003674	ribosomal protein S6 kinase activity	-1.1	down	0.049535	0.136012	yes
	BP	GO:0008150	response to UV-C	-2.08	down	0.049535	0.136012	yes
	BP	GO:0008150	cellular response to metal ion	1.99	up	0.049535	0.136012	yes
	BP	GO:0008150	epithelial cell fate determination, open tracheal system	1.68	up	0.049535	0.136012	yes
	BP	GO:0008150	glial cell migration	1.68	up	0.049535	0.136012	yes
	BP	GO:0008150	regulation of R7 cell differentiation	1.68	up	0.049535	0.136012	yes
	BP	GO:0008150	limb development	1.68	up	0.049535	0.136012	yes
	MF	GO:0003674	nucleotide-sugar transmembrane transporter activity	-1.25	down	0.049535	0.136012	yes
	MF	GO:0003674	dihydrolipoamide S-acyltransferase activity	1.63	up	0.049535	0.136012	yes
	BP	GO:0008150	head involution	-1.14	down	0.049535	0.136012	yes
	BP	GO:0008150	positive regulation of iron ion transmembrane transport	-1.14	down	0.049535	0.136012	yes
	BP	GO:0008150	positive regulation of cytokinesis	1.58	up	0.049535	0.136012	yes
	CC	GO:0005575	cytoplasmic ubiquitin ligase complex	Inf	up	0.036904	0.136012	yes
	MF	GO:0003674	Atg8 ligase activity	Inf	up	0.036904	0.136012	yes
	MF	GO:0003674	preQ1 synthase activity	1.73	up	0.049535	0.136012	yes
	MF	GO:0003674	6-deoxy-6-sulfofructose kinase activity	1.86	up	0.049535	0.136012	yes
	CC	GO:0005575	nuclear rDNA heterochromatin	-1.04	down	0.049535	0.136012	yes
	BP	GO:0008150	secondary shoot formation	-1.48	down	0.049535	0.136012	yes
	MF	GO:0003674	aminoglycoside phosphotransferase activity	1.07	up	0.049535	0.136012	yes
	BP	GO:0008150	diterpenoid biosynthetic process	1.54	up	0.049535	0.136012	yes
	MF	GO:0003674	2,3-dihydro-2,3-dihydroxybenzoate dehydrogenase activity	-1.39	down	0.049535	0.136012	yes
	MF	GO:0003674	salutaridine reductase (NADPH) activity	-1.51	down	0.049535	0.136012	yes
	BP	GO:0008150	morphine biosynthetic process	-1.51	down	0.049535	0.136012	yes
	MF	GO:0003674	ribonucleoprotein complex binding	-1.19	down	0.049535	0.136012	yes
	BP	GO:0008150	cell wall chitin biosynthetic process	Inf	up	0.036904	0.136012	yes
	BP	GO:0008150	cognition	-2.07	down	0.049535	0.136012	yes
	CC	GO:0005575	phosphatidylinositol 3-kinase complex	3.5	up	0.049535	0.136012	yes
	BP	GO:0008150	translational frameshifting	1.62	up	0.049535	0.136012	yes
	BP	GO:0008150	neuroblast proliferation	-1.77	down	0.049535	0.136012	yes
	BP	GO:0008150	negative regulation of sporulation	2.54	up	0.049535	0.136012	yes
	MF	GO:0003674	2-keto-3-deoxygluconate:proton symporter activity	1.42	up	0.049535	0.136012	yes
	CC	GO:0005575	DNA helicase A complex	-1.22	down	0.049535	0.136012	yes
	MF	GO:0003674	mannitol-1-phosphate 5-dehydrogenase activity	-2.68	down	0.049535	0.136012	yes
	BP	GO:0008150	mannitol catabolic process	-2.68	down	0.049535	0.136012	yes
	MF	GO:0003674	histone deacetylase activity (H3-K14 specific)	-1.07	down	0.049535	0.136012	yes
	MF	GO:0003674	NAD-dependent histone deacetylase activity (H3-K9 specific)	-1.07	down	0.049535	0.136012	yes
	MF	GO:0003674	NAD-dependent histone deacetylase activity (H4-K16 specific)	-1.07	down	0.049535	0.136012	yes
	BP	GO:0008150	regulation of histone H3-K9 methylation	-1.07	down	0.049535	0.136012	yes
	BP	GO:0008150	histone H3-K9 modification	-1.07	down	0.049535	0.136012	yes
	BP	GO:0008150	protein localization to chromosome, telomeric region	-1.07	down	0.049535	0.136012	yes
	MF	GO:0003674	histone deacetylase activity (H3-K4 specific)	-1.07	down	0.049535	0.136012	yes
	BP	GO:0008150	histone H3-K4 deacetylation	-1.07	down	0.049535	0.136012	yes
	BP	GO:0008150	histone H3-K9 deacetylation	-1.07	down	0.049535	0.136012	yes
	BP	GO:0008150	histone H4-K16 deacetylation	-1.07	down	0.049535	0.136012	yes
	BP	GO:0008150	histone H4-K12 deacetylation	-1.07	down	0.049535	0.136012	yes
	BP	GO:0008150	androgen biosynthetic process	-1.02	down	0.049535	0.136012	yes
	CC	GO:0005575	phosphorylase kinase complex	1.94	up	0.049535	0.136012	yes
	BP	GO:0008150	ammonia oxidation	1.23	up	0.049535	0.136012	yes
	BP	GO:0008150	inosine catabolic process	1.29	up	0.049535	0.136012	yes
	BP	GO:0008150	response to nitrogen compound	1.86	up	0.049535	0.136012	yes
	BP	GO:0008150	response to hydrogen sulfide	1.86	up	0.049535	0.136012	yes
	BP	GO:0008150	negative regulation of vulval development	-1.81	down	0.049535	0.136012	yes
	MF	GO:0003674	methylammonium transmembrane transporter activity	-1.42	down	0.049535	0.136012	yes
	BP	GO:0008150	protein localization to membrane	-1.44	down	0.049535	0.136012	yes
	BP	GO:0008150	negative regulation of protein localization to microtubule	-1.44	down	0.049535	0.136012	yes
	BP	GO:0008150	positive regulation of protein localization to endosome	-1.44	down	0.049535	0.136012	yes
	BP	GO:0008150	response to vitamin B2	1.01	up	0.049535	0.136012	yes
	BP	GO:0008150	heterochromatin maintenance	1.01	up	0.049535	0.136012	yes
	CC	GO:0005575	late endosome membrane	5.09	up	0.049535	0.136012	yes
	MF	GO:0003674	MAP kinase kinase kinase activity	1.32	up	0.049535	0.136012	yes
	CC	GO:0005575	early endosome membrane	-1.08	down	0.049535	0.136012	yes
	BP	GO:0008150	protein localization to phagophore assembly site	Inf	up	0.036904	0.136012	yes
	BP	GO:0008150	chromatin silencing at centromere	1.09	up	0.049535	0.136012	yes
	MF	GO:0003674	copper ion sensor activity	1.34	up	0.049535	0.136012	yes
	MF	GO:0003674	Atg12 activating enzyme activity	Inf	up	0.036904	0.136012	yes
	MF	GO:0003674	Atg8 activating enzyme activity	Inf	up	0.036904	0.136012	yes
	BP	GO:0008150	carbohydrate homeostasis	1.35	up	0.049535	0.136012	yes
	BP	GO:0008150	negative regulation of JNK cascade	1.27	up	0.049535	0.136012	yes
	MF	GO:0003674	all-trans-beta-apo-10'-carotenal cleavage oxygenase activity	-1.4	down	0.049535	0.136012	yes
	MF	GO:0003674	9-cis-10'-apo-beta-carotenal cleavage oxygenase activity	-1.4	down	0.049535	0.136012	yes
	BP	GO:0008150	strigolactone biosynthetic process	-1.4	down	0.049535	0.136012	yes
	BP	GO:0008150	dUMP metabolic process	1.63	up	0.049535	0.136012	yes
	BP	GO:0008150	error-free translesion synthesis	1.45	up	0.049535	0.136012	yes
	BP	GO:0008150	production of miRNAs involved in gene silencing by miRNA	-1.75	down	0.049535	0.136012	yes
	CC	GO:0005575	clathrin-coated pit	-2.3	down	0.049535	0.136012	yes
	BP	GO:0008150	anterior/posterior axis specification, embryo	2.32	up	0.049535	0.136012	yes
	MF	GO:0003674	choloyl-CoA hydrolase activity	1.09	up	0.049535	0.136012	yes
	BP	GO:0008150	negative regulation of CD4 biosynthetic process	1.09	up	0.049535	0.136012	yes
	BP	GO:0008150	protein localization to chloroplast	-1.86	down	0.049535	0.136012	yes
	BP	GO:0008150	regulation of cell aging	-1.86	down	0.049535	0.136012	yes
	MF	GO:0003674	SNAP receptor activity	Inf	up	0.036904	0.136012	yes
	BP	GO:0008150	vesicle fusion	Inf	up	0.036904	0.136012	yes
	CC	GO:0005575	SNARE complex	Inf	up	0.036904	0.136012	yes
	CC	GO:0005575	T=7 icosahedral viral capsid	-1.93	down	0.049535	0.136012	yes
	BP	GO:0008150	male meiosis cytokinesis	1.36	up	0.049535	0.136012	yes
	BP	GO:0008150	protein localization to cleavage furrow	1.36	up	0.049535	0.136012	yes
	MF	GO:0003674	succinyl-CoA hydrolase activity	2.03	up	0.049535	0.136012	yes
	BP	GO:0008150	saturated monocarboxylic acid metabolic process	2.03	up	0.049535	0.136012	yes
	BP	GO:0008150	unsaturated monocarboxylic acid metabolic process	2.03	up	0.049535	0.136012	yes
	BP	GO:0008150	regulation of extrinsic apoptotic signaling pathway	2.37	up	0.049535	0.136012	yes
	MF	GO:0003674	endoplasmic reticulum signal peptide binding	-1.07	down	0.049535	0.136012	yes
	MF	GO:0003674	D-serine transmembrane transporter activity	1.36	up	0.049535	0.136012	yes
	BP	GO:0008150	aldonate transmembrane transport	1.32	up	0.049535	0.136012	yes
	MF	GO:0003674	quercetin 3-O-glucosyltransferase activity	1.04	up	0.049535	0.136012	yes
	MF	GO:0003674	quercetin 7-O-glucosyltransferase activity	1.04	up	0.049535	0.136012	yes
	MF	GO:0003674	soladodine glucosyltransferase activity	1.04	up	0.049535	0.136012	yes
	MF	GO:0003674	brassicasterol glucosyltransferase activity	1.04	up	0.049535	0.136012	yes
	MF	GO:0003674	cholesterol allpha-glucosyltransferase activity	1.04	up	0.049535	0.136012	yes
	MF	GO:0003674	L-arabinose:NADP reductase activity	1.33	up	0.049535	0.136012	yes
	BP	GO:0008150	membrane organization	-1.56	down	0.049535	0.136012	yes
	MF	GO:0003674	oxidoreductase activity, acting on X-H and Y-H to form an X-Y bond, with oxygen as acceptor	-1.24	down	0.049535	0.136012	yes
	BP	GO:0008150	regulation of acetate catabolic process	-1.06	down	0.049535	0.136012	yes
	BP	GO:0008150	pituitary gland development	-1.41	down	0.049535	0.136012	yes
	MF	GO:0003674	dopamine binding	-1.51	down	0.049535	0.136012	yes
	BP	GO:0008150	cell adhesion mediated by integrin	-1.65	down	0.049535	0.136012	yes
	BP	GO:0008150	L-asparagine biosynthetic process	1.95	up	0.049535	0.136012	yes
	BP	GO:0008150	Roundabout signaling pathway	-1.18	down	0.049535	0.136012	yes
	BP	GO:0008150	retinoic acid receptor signaling pathway	-2.56	down	0.049535	0.136012	yes
	BP	GO:0008150	intra-S DNA damage checkpoint	2.6	up	0.049535	0.136012	yes
	MF	GO:0003674	COPII adaptor activity	-2.4	down	0.049535	0.136012	yes
	BP	GO:0008150	NADPH oxidation	-1.46	down	0.049535	0.136012	yes
	BP	GO:0008150	larval lymph gland hemopoiesis	1.77	up	0.049535	0.136012	yes
	BP	GO:0008150	cellular response to potassium ion starvation	-1.37	down	0.049535	0.136012	yes
	BP	GO:0008150	positive regulation of transcription from RNA polymerase II promoter in response to acidic pH	-1.37	down	0.049535	0.136012	yes
	MF	GO:0003674	maltose:proton symporter activity	Inf	up	0.036904	0.136012	yes
	MF	GO:0003674	sucrose:proton symporter activity	Inf	up	0.036904	0.136012	yes
	CC	GO:0005575	vacuolar lumen	3.02	up	0.049535	0.136012	yes
	BP	GO:0008150	mannosyl-inositol phosphorylceramide biosynthetic process	1.98	up	0.049535	0.136012	yes
	BP	GO:0008150	negative regulation of cytokine production	-1.1	down	0.049535	0.136012	yes
	MF	GO:0003674	sphingomyelin phosphodiesterase activity	1.45	up	0.049535	0.136012	yes
	CC	GO:0005575	zeta DNA polymerase complex	3.47	up	0.046302	0.136012	yes
	BP	GO:0008150	mitotic DNA replication leading strand elongation	2.2	up	0.049535	0.136012	yes
	CC	GO:0005575	multivesicular body membrane	Inf	up	0.036904	0.136012	yes
	BP	GO:0008150	multivesicular body membrane disassembly	Inf	up	0.036904	0.136012	yes
	MF	GO:0003674	sepiapterin reductase activity	-2.74	down	0.049535	0.136012	yes
	BP	GO:0008150	positive regulation of translational termination	Inf	up	0.036904	0.136012	yes
	MF	GO:0003674	3'-Phosphoadenylylselenate reductase activity	-1.39	down	0.049535	0.136012	yes
	CC	GO:0005575	dolichyl-phosphate-mannose-protein mannosyltransferase Pmt1p-Pmt2p dimer complex	Inf	up	0.036904	0.136012	yes
	CC	GO:0005575	dolichyl-phosphate-mannose-protein mannosyltransferase Pmt5p-Pmt2p dimer complex	Inf	up	0.036904	0.136012	yes
	BP	GO:0008150	intracellular lipid transport	1.53	up	0.049535	0.136012	yes
	CC	GO:0005575	plastid nucleoid	-1.81	down	0.049535	0.136012	yes
	CC	GO:0005575	integral component of Golgi membrane	4.74	up	0.049535	0.136012	yes
	MF	GO:0003674	glycylpeptide N-tetradecanoyltransferase activity	Inf	up	0.036904	0.136012	yes
	BP	GO:0008150	N-terminal peptidyl-glycine N-myristoylation	Inf	up	0.036904	0.136012	yes
	BP	GO:0008150	auxin efflux	-1.49	down	0.049535	0.136012	yes
	BP	GO:0008150	flavonol biosynthetic process	-1.49	down	0.049535	0.136012	yes
	MF	GO:0003674	nucleoside:proton symporter activity	-2.75	down	0.049535	0.136012	yes
	BP	GO:0008150	termination of signal transduction	1.25	up	0.049535	0.136012	yes
	BP	GO:0008150	negative regulation of interleukin-6 production	1.25	up	0.049535	0.136012	yes
	BP	GO:0008150	positive regulation of proteolysis involved in cellular protein catabolic process	1.25	up	0.049535	0.136012	yes
	CC	GO:0005575	chloroplast stromal thylakoid	-2.05	down	0.049535	0.136012	yes
	CC	GO:0005575	chloroplast photosystem II	-2.05	down	0.049535	0.136012	yes
	BP	GO:0008150	N-acetylglucosamine biosynthetic process	1.19	up	0.049535	0.136012	yes
	BP	GO:0008150	vesicle docking	Inf	up	0.036904	0.136012	yes
	BP	GO:0008150	negative regulation of cellular response to heat	3.93	up	0.049535	0.136012	yes
	BP	GO:0008150	amylopectin catabolic process	-2.36	down	0.049535	0.136012	yes
	BP	GO:0008150	regulation of stress-activated MAPK cascade	-2.71	down	0.046302	0.136012	yes
	BP	GO:0008150	natural killer cell mediated cytotoxicity	-2.71	down	0.046302	0.136012	yes
	BP	GO:0008150	virus induced gene silencing	-1.5	down	0.049535	0.136012	yes
	MF	GO:0003674	mercury ion transmembrane transporter activity	2.41	up	0.049535	0.136012	yes
	BP	GO:0008150	mercury ion transport	2.41	up	0.049535	0.136012	yes
	MF	GO:0003674	mercury ion binding	2.41	up	0.049535	0.136012	yes
	BP	GO:0008150	karyogamy	2.08	up	0.049535	0.136012	yes
	MF	GO:0003674	1-phosphatidylinositol-3-kinase regulator activity	2.62	up	0.049535	0.136012	yes
	CC	GO:0005575	filopodium	-3.81	down	0.049535	0.136012	yes
	BP	GO:0008150	response to dexamethasone	1.71	up	0.049535	0.136012	yes
	BP	GO:0008150	alternative respiration	3.35	up	0.049535	0.136012	yes
	MF	GO:0003674	extracellular matrix binding	-1.46	down	0.049535	0.136012	yes
	BP	GO:0008150	positive regulation of intracellular estrogen receptor signaling pathway	1.24	up	0.049535	0.136012	yes
	BP	GO:0008150	negative regulation of microtubule depolymerization	-1.92	down	0.049535	0.136012	yes
	MF	GO:0003674	3-hydroxybenzoate 4-monooxygenase activity	1.97	up	0.049535	0.136012	yes
	BP	GO:0008150	skeletal system morphogenesis	-1.48	down	0.049535	0.136012	yes
	BP	GO:0008150	epithelial tube branching involved in lung morphogenesis	-1.48	down	0.049535	0.136012	yes
	MF	GO:0003674	Roundabout binding	-1.34	down	0.049535	0.136012	yes
	BP	GO:0008150	axon extension involved in axon guidance	-1.34	down	0.049535	0.136012	yes
	BP	GO:0008150	regulation of axonogenesis	-1.34	down	0.049535	0.136012	yes
	BP	GO:0008150	mitotic G1 phase	-1.49	down	0.049535	0.136012	yes
	MF	GO:0003674	inositol phosphoceramide synthase activity	-1.49	down	0.049535	0.136012	yes
	BP	GO:0008150	heparan sulfate proteoglycan biosynthetic process, enzymatic modification	-2.79	down	0.049535	0.136012	yes
	MF	GO:0003674	heparan sulfate 6-O-sulfotransferase activity	-2.79	down	0.049535	0.136012	yes
	BP	GO:0008150	regulation of meristem development	3.38	up	0.049535	0.136012	yes
	MF	GO:0003674	sorbose reductase activity	2.07	up	0.049535	0.136012	yes
	BP	GO:0008150	ascospore wall chitin catabolic process	1.27	up	0.049535	0.136012	yes
	BP	GO:0008150	basic amino acid transmembrane export from vacuole	Inf	up	0.036904	0.136012	yes
	BP	GO:0008150	response to nematicide	-1.56	down	0.049535	0.136012	yes
	CC	GO:0005575	Maurer's cleft	Inf	up	0.036904	0.136012	yes
	MF	GO:0003674	precorrin-2 C20-methyltransferase activity	2.06	up	0.049535	0.136012	yes
	BP	GO:0008150	peptidyl-arginine methylation, to symmetrical-dimethyl arginine	1.07	up	0.049535	0.136012	yes
	MF	GO:0003674	pectin lyase activity	2.36	up	0.049535	0.136012	yes
	MF	GO:0003674	double-stranded telomeric DNA binding	Inf	up	0.036904	0.136012	yes
	BP	GO:0008150	telomeric loop formation	Inf	up	0.036904	0.136012	yes
	BP	GO:0008150	positive regulation of interleukin-12 production	-4.77	down	0.046302	0.136012	yes
	BP	GO:0008150	negative regulation of protein homooligomerization	1.6	up	0.049535	0.136012	yes
	BP	GO:0008150	regulation of water loss via skin	1.6	up	0.049535	0.136012	yes
	BP	GO:0008150	positive regulation of protein complex disassembly	1.6	up	0.049535	0.136012	yes
	BP	GO:0008150	skin morphogenesis	1.6	up	0.049535	0.136012	yes
	BP	GO:0008150	positive regulation of protein metabolic process	1.6	up	0.049535	0.136012	yes
	BP	GO:0008150	response to thyroid hormone	1.6	up	0.049535	0.136012	yes
	BP	GO:0008150	beta-glucoside catabolic process	1.6	up	0.049535	0.136012	yes
	BP	GO:0008150	positive regulation of protein lipidation	1.6	up	0.049535	0.136012	yes
	BP	GO:0008150	positive regulation of neuronal action potential	1.6	up	0.049535	0.136012	yes
	BP	GO:0008150	positive regulation of autophagy of mitochondrion in response to mitochondrial depolarization	1.6	up	0.049535	0.136012	yes
	BP	GO:0008150	autophagosome organization	1.6	up	0.049535	0.136012	yes
	BP	GO:0008150	spermidine acetylation	1.23	up	0.049535	0.136012	yes
	BP	GO:0008150	posttranscriptional gene silencing by RNA	1.39	up	0.049535	0.136012	yes
	BP	GO:0008150	phosphatidylglycerol catabolic process	-2.62	down	0.049535	0.136012	yes
	MF	GO:0003674	phosphatidylglycerol phospholipase C activity	-2.62	down	0.049535	0.136012	yes
	MF	GO:0003674	2-octaprenylphenol hydroxylase activity	-4.52	down	0.046302	0.136012	yes
	MF	GO:0003674	dihydroceramidase activity	Inf	up	0.036904	0.136012	yes
	BP	GO:0008150	phosphatidylinositol-mediated signaling	2.75	up	0.049535	0.136012	yes
	MF	GO:0003674	alpha-glucoside transmembrane transporter activity	Inf	up	0.036904	0.136012	yes
	BP	GO:0008150	inactivation of MAPK activity	Inf	up	0.036904	0.136012	yes
	MF	GO:0003674	MAP kinase tyrosine/serine/threonine phosphatase activity	Inf	up	0.036904	0.136012	yes
	BP	GO:0008150	regulation of endodermal cell fate specification	Inf	up	0.036904	0.136012	yes
	BP	GO:0008150	regulation of heart growth	Inf	up	0.036904	0.136012	yes
	MF	GO:0003674	pyridine N-methyltransferase activity	-1.38	down	0.049535	0.136012	yes
	BP	GO:0008150	tRNA N1-guanine methylation	1.03	up	0.049535	0.136012	yes
	MF	GO:0003674	tRNA (guanine(37)-N(1))-methyltransferase activity	1.03	up	0.049535	0.136012	yes
	MF	GO:0003674	proton binding	4.08	up	0.046302	0.136012	yes
	MF	GO:0003674	L-glucuronate reductase activity	Inf	up	0.036904	0.136012	yes
	MF	GO:0003674	palmitoleoyl [acyl-carrier-protein]-dependent acyltransferase activity	-1.59	down	0.049535	0.136012	yes
	BP	GO:0008150	Kdo2-lipid A biosynthetic process	-1.59	down	0.049535	0.136012	yes
	BP	GO:0008150	positive regulation of antibacterial peptide production	Inf	up	0.036904	0.136012	yes
	BP	GO:0008150	bicarbonate transport	2.38	up	0.049535	0.136012	yes
	BP	GO:0008150	neuroblast fate determination	-2.2	down	0.049535	0.136012	yes
	BP	GO:0008150	regulation of synaptic growth at neuromuscular junction	-2.2	down	0.049535	0.136012	yes
	BP	GO:0008150	rRNA transcription	-2.2	down	0.049535	0.136012	yes
	BP	GO:0008150	segmentation	-2.2	down	0.049535	0.136012	yes
	CC	GO:0005575	basal cortex	-2.2	down	0.049535	0.136012	yes
	BP	GO:0008150	regulation of neurogenesis	-2.2	down	0.049535	0.136012	yes
	BP	GO:0008150	asymmetric neuroblast division resulting in ganglion mother cell formation	-2.2	down	0.049535	0.136012	yes
	BP	GO:0008150	regulation of synaptic vesicle endocytosis	-2.2	down	0.049535	0.136012	yes
	BP	GO:0008150	regulation of neuroblast proliferation	-2.2	down	0.049535	0.136012	yes
	BP	GO:0008150	activation of MAPKK activity involved in osmosensory signaling pathway	1.47	up	0.049535	0.136012	yes
	BP	GO:0008150	stress-activated MAPK cascade	1.47	up	0.049535	0.136012	yes
	BP	GO:0008150	multidimensional cell growth	3.07	up	0.049535	0.136012	yes
	BP	GO:0008150	plant-type primary cell wall biogenesis	3.07	up	0.049535	0.136012	yes
	CC	GO:0005575	cellulose synthase complex	3.07	up	0.049535	0.136012	yes
	MF	GO:0003674	cellulose synthase (UDP-forming) activity	3.07	up	0.049535	0.136012	yes
	MF	GO:0003674	sphingolipid delta-4 desaturase activity	1.47	up	0.049535	0.136012	yes
	BP	GO:0008150	protein delipidation	Inf	up	0.036904	0.136012	yes
	BP	GO:0008150	glucan metabolic process	-4.42	down	0.046302	0.136012	yes
	BP	GO:0008150	vacuolar protein processing	Inf	up	0.036904	0.136012	yes
	BP	GO:0008150	neutral lipid catabolic process	Inf	up	0.036904	0.136012	yes
	MF	GO:0003674	1-phosphatidylinositol-3-kinase activity	Inf	up	0.036904	0.136012	yes
	MF	GO:0003674	calcium-dependent cysteine-type endopeptidase activity	Inf	up	0.036904	0.136012	yes
	BP	GO:0008150	substituted mannan metabolic process	1.41	up	0.049535	0.136012	yes
	BP	GO:0008150	chitin biosynthetic process	Inf	up	0.036904	0.136012	yes
	BP	GO:0008150	lipid modification	-1.31	down	0.049535	0.136012	yes
	BP	GO:0008150	B cell cytokine production	-Inf	down	0.036904	0.136012	yes
	BP	GO:0008150	positive regulation of T cell mediated immune response to tumor cell	-Inf	down	0.036904	0.136012	yes
	CC	GO:0005575	cyclin-dependent protein kinase activating kinase holoenzyme complex	-Inf	down	0.036904	0.136012	yes
	CC	GO:0005575	coated vesicle	-Inf	down	0.036904	0.136012	yes
	BP	GO:0008150	positive regulation of interferon-alpha production	-Inf	down	0.036904	0.136012	yes
	BP	GO:0008150	positive regulation of interferon-gamma production	-Inf	down	0.036904	0.136012	yes
	BP	GO:0008150	positive regulation of interleukin-10 production	-Inf	down	0.036904	0.136012	yes
	BP	GO:0008150	positive regulation of interleukin-6 production	-Inf	down	0.036904	0.136012	yes
	CC	GO:0005575	lipopolysaccharide receptor complex	-Inf	down	0.036904	0.136012	yes
	BP	GO:0008150	isotype switching to IgG isotypes	-Inf	down	0.036904	0.136012	yes
	BP	GO:0008150	positive regulation of T cell activation	-Inf	down	0.036904	0.136012	yes
	BP	GO:0008150	positive regulation of RNA splicing	1.23	up	0.049535	0.136012	yes
	CC	GO:0005575	muscle tendon junction	-1.94	down	0.049535	0.136012	yes
	BP	GO:0008150	hatching	2.3	up	0.049535	0.136012	yes
	BP	GO:0008150	L-sorbose catabolic process	2.41	up	0.046302	0.136012	yes
	BP	GO:0008150	ITP catabolic process	Inf	up	0.036904	0.136012	yes
	BP	GO:0008150	mRNA stabilization	Inf	up	0.036904	0.136012	yes
	MF	GO:0003674	eukaryotic initiation factor 4G binding	Inf	up	0.036904	0.136012	yes
	BP	GO:0008150	negative regulation of nuclear-transcribed mRNA poly(A) tail shortening	Inf	up	0.036904	0.136012	yes
	BP	GO:0008150	positive regulation of nuclear-transcribed mRNA poly(A) tail shortening	Inf	up	0.036904	0.136012	yes
	BP	GO:0008150	positive regulation of nuclear-transcribed mRNA catabolic process, deadenylation-dependent decay	Inf	up	0.036904	0.136012	yes
	MF	GO:0003674	mRNA (guanine-N7-)-methyltransferase activity	Inf	up	0.036904	0.136012	yes
	CC	GO:0005575	mRNA cap binding complex	Inf	up	0.036904	0.136012	yes
	CC	GO:0005575	mitochondrial crista	-1.68	down	0.049535	0.136012	yes
	MF	GO:0003674	oxoglutarate:malate antiporter activity	1.58	up	0.049535	0.136012	yes
	MF	GO:0003674	nicotinamide riboside transmembrane transporter activity	-1.4	down	0.049535	0.136012	yes
	BP	GO:0008150	nicotinamide riboside transport	-1.4	down	0.049535	0.136012	yes
	BP	GO:0008150	negative regulation of glucokinase activity	1.2	up	0.049535	0.136012	yes
	MF	GO:0003674	interleukin-6 receptor binding	-2.56	down	0.049535	0.136012	yes
	BP	GO:0008150	membrane protein ectodomain proteolysis	-2.56	down	0.049535	0.136012	yes
	BP	GO:0008150	histone H3-K9 methylation	-4.79	down	0.046302	0.136012	yes
	MF	GO:0003674	alpha-glucosidase activity	1.62	up	0.049535	0.136012	yes
	BP	GO:0008150	hexitol metabolic process	-2.28	down	0.049535	0.136012	yes
	MF	GO:0003674	cytokinin receptor activity	2.61	up	0.049535	0.136012	yes
	BP	GO:0008150	regulation of seed germination	2.61	up	0.049535	0.136012	yes
	BP	GO:0008150	regulation of defense response	4.15	up	0.046302	0.136012	yes
	BP	GO:0008150	hydrogen peroxide transmembrane transport	4.15	up	0.046302	0.136012	yes
	MF	GO:0003674	1-acylglycerophosphocholine O-acyltransferase activity	Inf	up	0.036904	0.136012	yes
	BP	GO:0008150	negative regulation of histone acetylation	1.35	up	0.049535	0.136012	yes
	MF	GO:0003674	double-stranded DNA-dependent ATP-dependent DNA helicase activity	1.35	up	0.049535	0.136012	yes
	BP	GO:0008150	oxidative DNA demethylation	Inf	up	0.036904	0.136012	yes
	BP	GO:0008150	syncytium formation by plasma membrane fusion	Inf	up	0.036904	0.136012	yes
	BP	GO:0008150	hypotonic response	Inf	up	0.036904	0.136012	yes
	BP	GO:0008150	intracellular transport	Inf	up	0.036904	0.136012	yes
	BP	GO:0008150	substantia nigra development	1.09	up	0.049535	0.136012	yes
	BP	GO:0008150	acrosome reaction	-2.62	down	0.049535	0.136012	yes
	MF	GO:0003674	alpha,alpha-trehalose phosphorylase (configuration-retaining) activity	2.24	up	0.049535	0.136012	yes
	BP	GO:0008150	positive regulation of type I interferon production	1.02	up	0.049535	0.136012	yes
	BP	GO:0008150	formate catabolic process	1.79	up	0.049535	0.136012	yes
	BP	GO:0008150	regulation of chlorophyll catabolic process	2.83	up	0.049535	0.136012	yes
	BP	GO:0008150	negative regulation of iron ion transport	2.83	up	0.049535	0.136012	yes
	BP	GO:0008150	cellular response to abscisic acid stimulus	2.83	up	0.049535	0.136012	yes
	BP	GO:0008150	secondary growth	2.83	up	0.049535	0.136012	yes
	BP	GO:0008150	first cell cycle pseudocleavage	2.08	up	0.049535	0.136012	yes
	BP	GO:0008150	maintenance of centrosome location	2.08	up	0.049535	0.136012	yes
	BP	GO:0008150	positive regulation of oocyte maturation	2.08	up	0.049535	0.136012	yes
	BP	GO:0008150	regulation of meiotic cell cycle process involved in oocyte maturation	2.08	up	0.049535	0.136012	yes
	BP	GO:0008150	exit from meiosis	2.08	up	0.049535	0.136012	yes
	MF	GO:0003674	MAP kinase phosphatase activity	Inf	up	0.036904	0.136012	yes
	BP	GO:0008150	positive regulation of mitotic cell cycle	Inf	up	0.036904	0.136012	yes
	BP	GO:0008150	negative regulation of T cell receptor signaling pathway	Inf	up	0.036904	0.136012	yes
	BP	GO:0008150	negative regulation of T cell activation	Inf	up	0.036904	0.136012	yes
	BP	GO:0008150	mixed acid fermentation	1.79	up	0.049535	0.136012	yes
	BP	GO:0008150	leaf vascular tissue pattern formation	-Inf	down	0.036904	0.136012	yes
	BP	GO:0008150	leaf proximal/distal pattern formation	-Inf	down	0.036904	0.136012	yes
	MF	GO:0003674	MHC protein binding	-3.14	down	0.049535	0.136012	yes
	BP	GO:0008150	positive regulation of cytoplasmic translational elongation through polyproline stretches	Inf	up	0.036904	0.136012	yes
	MF	GO:0003674	sodium:potassium:chloride symporter activity	2.89	up	0.049535	0.136012	yes
	MF	GO:0003674	cation:chloride symporter activity	2.89	up	0.049535	0.136012	yes
	MF	GO:0003674	sodium:chloride symporter activity	2.89	up	0.049535	0.136012	yes
	BP	GO:0008150	chloride ion homeostasis	2.89	up	0.049535	0.136012	yes
	BP	GO:0008150	potassium ion homeostasis	2.89	up	0.049535	0.136012	yes
	BP	GO:0008150	sodium ion homeostasis	2.89	up	0.049535	0.136012	yes
	MF	GO:0003674	muconolactone delta-isomerase activity	3.21	up	0.046302	0.136012	yes
	MF	GO:0003674	active borate transmembrane transporter activity	-2.06	down	0.046302	0.136012	yes
	CC	GO:0005575	chloroplast ATP synthase complex	3.26	up	0.046302	0.136012	yes
	BP	GO:0008150	mitochondrial respiratory chain complex III assembly	Inf	up	0.036904	0.136012	yes
	BP	GO:0008150	RNA 5'-cap (guanine-N7)-methylation	Inf	up	0.036904	0.136012	yes
	BP	GO:0008150	regulation of response to drug	-4.14	down	0.046302	0.136012	yes
	BP	GO:0008150	p-aminobenzoyl-glutamate transport	-1.31	down	0.049535	0.136012	yes
	MF	GO:0003674	inositol monophosphate phosphatase activity	-2.09	down	0.049535	0.136012	yes
	BP	GO:0008150	RNA polymerase II core complex assembly	Inf	up	0.036904	0.136012	yes
	BP	GO:0008150	ferric iron import across plasma membrane	-3.4	down	0.049535	0.136012	yes
	MF	GO:0003674	zinc efflux transmembrane transporter activity	Inf	up	0.036904	0.136012	yes
	MF	GO:0003674	hexose oxidase activity	2.83	up	0.049535	0.136012	yes
	BP	GO:0008150	L-ascorbic acid catabolic process	-3.16	down	0.046302	0.136012	yes
	BP	GO:0008150	regulation of epidermal growth factor receptor signaling pathway	2.51	up	0.046302	0.136012	yes
	CC	GO:0005575	kinetochore	-2.96	down	0.049535	0.136012	yes
	MF	GO:0003674	rhamnulose-1-phosphate aldolase activity	1.54	up	0.049535	0.136012	yes
	BP	GO:0008150	positive regulation of plasma membrane long-chain fatty acid transport	Inf	up	0.036904	0.136012	yes
	BP	GO:0008150	positive regulation of triglyceride biosynthetic process	Inf	up	0.036904	0.136012	yes
	BP	GO:0008150	slug development involved in sorocarp development	4	up	0.046302	0.136012	yes
	CC	GO:0005575	cortical dynamic polarity patch	-1.98	down	0.049535	0.136012	yes
	BP	GO:0008150	peptide pheromone transmembrane export involved in positive regulation of conjugation with cellular fusion	-1.98	down	0.049535	0.136012	yes
	MF	GO:0003674	mRNA guanylyltransferase activity	Inf	up	0.036904	0.136012	yes
	MF	GO:0003674	polynucleotide 5'-phosphatase activity	Inf	up	0.036904	0.136012	yes
	BP	GO:0008150	hemoglobin catabolic process	Inf	up	0.036904	0.136012	yes
	MF	GO:0003674	low-affinity glucose:sodium symporter activity	-1.43	down	0.049535	0.136012	yes
	MF	GO:0003674	tRNA-specific adenosine deaminase activity	Inf	up	0.036904	0.136012	yes
	CC	GO:0005575	MBF transcription complex	-3.66	down	0.046302	0.136012	yes
	BP	GO:0008150	positive regulation of transcription involved in G1/S transition of mitotic cell cycle	-3.66	down	0.046302	0.136012	yes
	BP	GO:0008150	positive regulation of sulfur metabolic process	-3.99	down	0.046302	0.136012	yes
	MF	GO:0003674	bile-salt sulfotransferase activity	2.84	up	0.046302	0.136012	yes
	MF	GO:0003674	inulinase activity	Inf	up	0.036904	0.136012	yes
	BP	GO:0008150	peptidyl-arginine methylation, to asymmetrical-dimethyl arginine	-Inf	down	0.036904	0.136012	yes
	MF	GO:0003674	lipopolysaccharide core heptosyltransferase activity	-3.93	down	0.046302	0.136012	yes
	BP	GO:0008150	pupal chitin-based cuticle development	2.08	up	0.049535	0.136012	yes
	BP	GO:0008150	sperm storage	2.08	up	0.049535	0.136012	yes
	BP	GO:0008150	dorsal trunk growth, open tracheal system	-3.38	down	0.046302	0.136012	yes
	BP	GO:0008150	long term synaptic depression	2.44	up	0.049535	0.136012	yes
	BP	GO:0008150	regulation of endocannabinoid signaling pathway	2.44	up	0.049535	0.136012	yes
	BP	GO:0008150	melanosome organization	-Inf	down	0.036904	0.136012	yes
	BP	GO:0008150	spermidine metabolic process	1.22	up	0.049535	0.136012	yes
PM/NPK	CC	GO:0005575	viral assembly intermediate	-1.32	down	0.049535	0.231214	yes
	CC	GO:0005575	anchored component of external side of plasma membrane	1	up	0.049535	0.231214	yes
	BP	GO:0008150	RNA folding	1.47	up	0.049535	0.231214	yes
	BP	GO:0008150	Group I intron splicing	1.97	up	0.049535	0.231214	yes
	MF	GO:0003674	maltodextrin transmembrane transporter activity	-2.21	down	0.049535	0.231214	yes
	CC	GO:0005575	mitochondrial proton-transporting ATP synthase complex, coupling factor F(o)	1.58	up	0.049535	0.231214	yes
	MF	GO:0003674	bubble DNA binding	1.02	up	0.049535	0.231214	yes
	MF	GO:0003674	ATP-dependent DNA/RNA helicase activity	1.05	up	0.049535	0.231214	yes
	MF	GO:0003674	preribosome binding	1	up	0.049535	0.231214	yes
	CC	GO:0005575	retrotransposon nucleocapsid	-2.73	down	0.049535	0.231214	yes
	MF	GO:0003674	[formate-C-acetyltransferase]-activating enzyme activity	1.38	up	0.049535	0.231214	yes
	BP	GO:0008150	isoleucine transport	-1.02	down	0.049535	0.231214	yes
	BP	GO:0008150	valine transport	-1.02	down	0.049535	0.231214	yes
	BP	GO:0008150	cellular response to bacteriocin	1.02	up	0.049535	0.231214	yes
	BP	GO:0008150	xanthophyll catabolic process	-1.33	down	0.049535	0.231214	yes
	BP	GO:0008150	cellular response to cadmium ion	1	up	0.049535	0.231214	yes
	MF	GO:0003674	fimbrial usher porin activity	2.05	up	0.049535	0.231214	yes
	MF	GO:0003674	guanyl ribonucleotide binding	1.34	up	0.049535	0.231214	yes
	BP	GO:0008150	dCDP biosynthetic process	1.1	up	0.049535	0.231214	yes
	BP	GO:0008150	CDP metabolic process	1.1	up	0.049535	0.231214	yes
	BP	GO:0008150	cellular response to sucrose stimulus	1.02	up	0.049535	0.231214	yes
	BP	GO:0008150	tyrosine biosynthetic process from chorismate via 4-hydroxyphenylpyruvate	-1.44	down	0.049535	0.231214	yes
	MF	GO:0003674	L-leucine:2-oxoglutarate aminotransferase activity	-1.44	down	0.049535	0.231214	yes
	BP	GO:0008150	mitochondrial DNA metabolic process	2.62	up	0.049535	0.231214	yes
	BP	GO:0008150	regulation of ossification	1.05	up	0.049535	0.231214	yes
	BP	GO:0008150	swimming	1.14	up	0.049535	0.231214	yes
	MF	GO:0003674	exodeoxyribonuclease I activity	1.53	up	0.049535	0.231214	yes
	BP	GO:0008150	glycophagy	1.18	up	0.049535	0.231214	yes
	BP	GO:0008150	positive regulation of glycogen catabolic process	1.18	up	0.049535	0.231214	yes
	MF	GO:0003674	beta-1,4-mannosyltransferase activity	1.28	up	0.049535	0.231214	yes
	BP	GO:0008150	clearance of foreign intracellular DNA	1.82	up	0.049535	0.231214	yes
	BP	GO:0008150	xanthine oxidation	1.06	up	0.049535	0.231214	yes
	BP	GO:0008150	regulation of transcription from RNA polymerase II promoter in response to oxidative stress	-1.09	down	0.049535	0.231214	yes
	BP	GO:0008150	positive regulation of transcription from RNA polymerase II promoter in response to heat stress	-1.09	down	0.049535	0.231214	yes
	BP	GO:0008150	regulation of conjugation with cellular fusion by regulation of transcription from RNA polymerase II promoter	-1.09	down	0.049535	0.231214	yes
	CC	GO:0005575	F-actin capping protein complex	-1.18	down	0.049535	0.231214	yes
	BP	GO:0008150	barbed-end actin filament capping	-1.18	down	0.049535	0.231214	yes
	MF	GO:0003674	heme oxygenase (decyclizing) activity	-1.32	down	0.049535	0.231214	yes
	BP	GO:0008150	heme catabolic process	-1.32	down	0.049535	0.231214	yes
	MF	GO:0003674	choline transmembrane transporter activity	1.05	up	0.049535	0.231214	yes
	BP	GO:0008150	putrescine metabolic process	1.13	up	0.049535	0.231214	yes
	CC	GO:0005575	viral capsid	-2.04	down	0.049535	0.231214	yes
	MF	GO:0003674	tRNA (guanine) methyltransferase activity	1.21	up	0.049535	0.231214	yes
	BP	GO:0008150	mRNA modification	1.18	up	0.049535	0.231214	yes
	BP	GO:0008150	catabolism by organism of cell wall peptidoglycan in other organism	-1.4	down	0.049535	0.231214	yes
	BP	GO:0008150	photosystem II assembly	1.8	up	0.049535	0.231214	yes
	BP	GO:0008150	positive gravitropism	-1.18	down	0.049535	0.231214	yes
	MF	GO:0003674	phenylalanine ammonia-lyase activity	-1.81	down	0.049535	0.231214	yes
	BP	GO:0008150	toll-like receptor TLR1:TLR2 signaling pathway	-1.28	down	0.049535	0.231214	yes
	BP	GO:0008150	root hair cell development	-1.02	down	0.049535	0.231214	yes
	BP	GO:0008150	viral capsid assembly	-3.9	down	0.046302	0.231214	yes
	MF	GO:0003674	p53 binding	-1.24	down	0.049535	0.231214	yes
	BP	GO:0008150	sexual sporulation resulting in formation of a cellular spore	-1.41	down	0.049535	0.231214	yes
	BP	GO:0008150	negative regulation of sexual sporulation resulting in formation of a cellular spore	-1.41	down	0.049535	0.231214	yes
	BP	GO:0008150	age-dependent response to oxidative stress	1.22	up	0.049535	0.231214	yes
	MF	GO:0003674	oligosaccharide binding	1.38	up	0.049535	0.231214	yes
	BP	GO:0008150	secondary shoot formation	-1.51	down	0.049535	0.231214	yes
	BP	GO:0008150	maintenance of CRISPR repeat elements	-3.84	down	0.049535	0.231214	yes
	BP	GO:0008150	detection of temperature stimulus involved in sensory perception of pain	-1.52	down	0.049535	0.231214	yes
	MF	GO:0003674	bile acid binding	1.01	up	0.049535	0.231214	yes
	CC	GO:0005575	GMP reductase complex	-1.18	down	0.049535	0.231214	yes
	MF	GO:0003674	ferrichrome transmembrane transporter activity	1.08	up	0.049535	0.231214	yes
	BP	GO:0008150	chromatin silencing at centromere	1.33	up	0.049535	0.231214	yes
	BP	GO:0008150	photosynthetic electron transport in photosystem II	1.33	up	0.049535	0.231214	yes
	BP	GO:0008150	cellular defense response	-1.15	down	0.049535	0.231214	yes
	BP	GO:0008150	craniofacial suture morphogenesis	-1.15	down	0.049535	0.231214	yes
	BP	GO:0008150	re-entry into mitotic cell cycle after pheromone arrest	-1.85	down	0.049535	0.231214	yes
	CC	GO:0005575	clathrin-coated pit	-1.5	down	0.049535	0.231214	yes
	BP	GO:0008150	toll-like receptor 5 signaling pathway	2.78	up	0.049535	0.231214	yes
	MF	GO:0003674	carbazole 1,9a-dioxygenase activity	1.11	up	0.049535	0.231214	yes
	BP	GO:0008150	chronic inflammatory response to antigenic stimulus	1.5	up	0.049535	0.231214	yes
	MF	GO:0003674	adenyl nucleotide binding	1.5	up	0.049535	0.231214	yes
	BP	GO:0008150	homocysteine biosynthetic process	1.5	up	0.049535	0.231214	yes
	MF	GO:0003674	2,3-dihydro-2,3-dihydroxybenzoate dehydrogenase activity	-2	down	0.049535	0.231214	yes
	MF	GO:0003674	precorrin-3B C17-methyltransferase activity	1.24	up	0.049535	0.231214	yes
	BP	GO:0008150	carbon catabolite repression of of transcription by glucose	1	up	0.049535	0.231214	yes
	BP	GO:0008150	cellular response to metal ion	1.56	up	0.049535	0.231214	yes
	MF	GO:0003674	preQ1 synthase activity	1.36	up	0.049535	0.231214	yes
	BP	GO:0008150	alkaloid biosynthetic process	1.23	up	0.049535	0.231214	yes
	BP	GO:0008150	ammonia oxidation	1.04	up	0.049535	0.231214	yes
	MF	GO:0003674	dihydrolipoamide S-acyltransferase activity	1.13	up	0.049535	0.231214	yes
	BP	GO:0008150	retinoic acid receptor signaling pathway	-1.54	down	0.049535	0.231214	yes
	BP	GO:0008150	globoside biosynthetic process	1.13	up	0.049535	0.231214	yes
	MF	GO:0003674	lactosylceramide 4-alpha-galactosyltransferase activity	1.13	up	0.049535	0.231214	yes
	MF	GO:0003674	methylammonium transmembrane transporter activity	-2.26	down	0.049535	0.231214	yes
	BP	GO:0008150	male genitalia development	-1.14	down	0.049535	0.231214	yes
	MF	GO:0003674	all-trans-beta-apo-10'-carotenal cleavage oxygenase activity	-1.88	down	0.049535	0.231214	yes
	MF	GO:0003674	9-cis-10'-apo-beta-carotenal cleavage oxygenase activity	-1.88	down	0.049535	0.231214	yes
	BP	GO:0008150	strigolactone biosynthetic process	-1.88	down	0.049535	0.231214	yes
	MF	GO:0003674	6-deoxy-6-sulfofructose kinase activity	1.26	up	0.049535	0.231214	yes
	BP	GO:0008150	retrograde transport, vesicle recycling within Golgi	1.18	up	0.049535	0.231214	yes
	CC	GO:0005575	Golgi transport complex	1.18	up	0.049535	0.231214	yes
	BP	GO:0008150	Golgi vesicle prefusion complex stabilization	1.18	up	0.049535	0.231214	yes
	BP	GO:0008150	positive regulation of fatty acid beta-oxidation	1.88	up	0.049535	0.231214	yes
	BP	GO:0008150	negative regulation of induction of conjugation with cellular fusion	1.34	up	0.049535	0.231214	yes
	BP	GO:0008150	adenylate cyclase-activating glucose-activated G-protein coupled receptor signaling pathway	1.34	up	0.049535	0.231214	yes
	CC	GO:0005575	T=7 icosahedral viral capsid	-3.28	down	0.049535	0.231214	yes
	CC	GO:0005575	filopodium	-1.69	down	0.049535	0.231214	yes
	BP	GO:0008150	alternative respiration	3.65	up	0.049535	0.231214	yes
	BP	GO:0008150	response to nitrogen compound	1.24	up	0.049535	0.231214	yes
	BP	GO:0008150	response to hydrogen sulfide	1.24	up	0.049535	0.231214	yes
	BP	GO:0008150	malate transport	1.24	up	0.049535	0.231214	yes
	MF	GO:0003674	COPII adaptor activity	-3.27	down	0.049535	0.231214	yes
	BP	GO:0008150	N-acetylglucosamine biosynthetic process	1.39	up	0.049535	0.231214	yes
	BP	GO:0008150	larval lymph gland hemopoiesis	1.67	up	0.049535	0.231214	yes
	CC	GO:0005575	chloroplast stromal thylakoid	-1.84	down	0.049535	0.231214	yes
	CC	GO:0005575	chloroplast photosystem II	-1.84	down	0.049535	0.231214	yes
	MF	GO:0003674	3'-Phosphoadenylylselenate reductase activity	-1.69	down	0.049535	0.231214	yes
	MF	GO:0003674	nucleoside:proton symporter activity	-2.88	down	0.049535	0.231214	yes
	BP	GO:0008150	ascospore wall chitin catabolic process	1.44	up	0.049535	0.231214	yes
	BP	GO:0008150	positive regulation of interleukin-12 production	-2.09	down	0.049535	0.231214	yes
	MF	GO:0003674	2-octaprenylphenol hydroxylase activity	-1.78	down	0.049535	0.231214	yes
	BP	GO:0008150	negative regulation of glucokinase activity	2	up	0.049535	0.231214	yes
	BP	GO:0008150	positive regulation of RNA splicing	1.81	up	0.049535	0.231214	yes
	BP	GO:0008150	negative regulation of histone H3-K36 methylation	-1.66	down	0.049535	0.231214	yes
	MF	GO:0003674	macrolide binding	-1.66	down	0.049535	0.231214	yes
	BP	GO:0008150	neuroblast development	-1.14	down	0.049535	0.231214	yes
	BP	GO:0008150	ganglion mother cell fate determination	-1.14	down	0.049535	0.231214	yes
	BP	GO:0008150	neuroblast fate determination	-1.14	down	0.049535	0.231214	yes
	BP	GO:0008150	regulation of synaptic growth at neuromuscular junction	-1.14	down	0.049535	0.231214	yes
	BP	GO:0008150	rRNA transcription	-1.14	down	0.049535	0.231214	yes
	BP	GO:0008150	segmentation	-1.14	down	0.049535	0.231214	yes
	CC	GO:0005575	basal cortex	-1.14	down	0.049535	0.231214	yes
	BP	GO:0008150	regulation of neurogenesis	-1.14	down	0.049535	0.231214	yes
	BP	GO:0008150	asymmetric neuroblast division resulting in ganglion mother cell formation	-1.14	down	0.049535	0.231214	yes
	BP	GO:0008150	regulation of synaptic vesicle endocytosis	-1.14	down	0.049535	0.231214	yes
	BP	GO:0008150	regulation of neuroblast proliferation	-1.14	down	0.049535	0.231214	yes
	CC	GO:0005575	plastid nucleoid	-3.36	down	0.049535	0.231214	yes
	BP	GO:0008150	B cell cytokine production	-1.88	down	0.049535	0.231214	yes
	BP	GO:0008150	positive regulation of T cell mediated immune response to tumor cell	-1.88	down	0.049535	0.231214	yes
	CC	GO:0005575	cyclin-dependent protein kinase activating kinase holoenzyme complex	-1.88	down	0.049535	0.231214	yes
	CC	GO:0005575	coated vesicle	-1.88	down	0.049535	0.231214	yes
	BP	GO:0008150	positive regulation of interferon-alpha production	-1.88	down	0.049535	0.231214	yes
	BP	GO:0008150	positive regulation of interferon-gamma production	-1.88	down	0.049535	0.231214	yes
	BP	GO:0008150	positive regulation of interleukin-10 production	-1.88	down	0.049535	0.231214	yes
	BP	GO:0008150	positive regulation of interleukin-6 production	-1.88	down	0.049535	0.231214	yes
	CC	GO:0005575	lipopolysaccharide receptor complex	-1.88	down	0.049535	0.231214	yes
	BP	GO:0008150	isotype switching to IgG isotypes	-1.88	down	0.049535	0.231214	yes
	BP	GO:0008150	positive regulation of T cell activation	-1.88	down	0.049535	0.231214	yes
	BP	GO:0008150	cellular response to lipid	-2.1	down	0.049535	0.231214	yes
	BP	GO:0008150	regulation of Wnt signaling pathway	1.04	up	0.049535	0.231214	yes
	BP	GO:0008150	terrequinone A biosynthetic process	-1	down	0.049535	0.231214	yes
	BP	GO:0008150	response to nematicide	-1.93	down	0.049535	0.231214	yes
	CC	GO:0005575	prospore membrane	-2.67	down	0.049535	0.231214	yes
	BP	GO:0008150	embryonic development via the syncytial blastoderm	-1.93	down	0.049535	0.231214	yes
	MF	GO:0003674	histone methyltransferase activity (H3-K9 specific)	-1.93	down	0.049535	0.231214	yes
	BP	GO:0008150	negative regulation of histone H3-K27 methylation	-1.93	down	0.049535	0.231214	yes
	MF	GO:0003674	alcohol sulfotransferase activity	3.58	up	0.046302	0.231214	yes
	BP	GO:0008150	cellular response to lipopolysaccharide	1.2	up	0.049535	0.231214	yes
	MF	GO:0003674	oxoglutarate:malate antiporter activity	1.79	up	0.049535	0.231214	yes
	MF	GO:0003674	L-tyrosine transmembrane transporter activity	-1.2	down	0.049535	0.231214	yes
	BP	GO:0008150	negative regulation of serotonin secretion	-1.77	down	0.049535	0.231214	yes
	BP	GO:0008150	positive regulation of dopamine metabolic process	-1.77	down	0.049535	0.231214	yes
	BP	GO:0008150	signal transduction involved in filamentous growth	1.7	up	0.049535	0.231214	yes
	BP	GO:0008150	growth of unicellular organism as a thread of attached cells	1.7	up	0.049535	0.231214	yes
	BP	GO:0008150	positive regulation of growth of unicellular organism as a thread of attached cells	1.7	up	0.049535	0.231214	yes
	BP	GO:0008150	cellular response to carbon dioxide	1.7	up	0.049535	0.231214	yes
	BP	GO:0008150	positive regulation of phenotypic switching	1.7	up	0.049535	0.231214	yes
	BP	GO:0008150	ectoine biosynthetic process	3.46	up	0.046302	0.231214	yes
	CC	GO:0005575	phosphatidylinositol 3-kinase complex	1.83	up	0.049535	0.231214	yes
	MF	GO:0003674	1-phosphatidylinositol-3-kinase regulator activity	1.83	up	0.049535	0.231214	yes
	MF	GO:0003674	D-amino-acid oxidase activity	-2.42	down	0.049535	0.231214	yes
	BP	GO:0008150	acrosome reaction	-1.78	down	0.049535	0.231214	yes
	BP	GO:0008150	lumen formation, open tracheal system	-2.82	down	0.049535	0.231214	yes
	MF	GO:0003674	active borate transmembrane transporter activity	-1.44	down	0.049535	0.231214	yes
	MF	GO:0003674	2,4-dihydroxyhept-2-ene-1,7-dioate aldolase activity	-1.22	down	0.049535	0.231214	yes
	BP	GO:0008150	triglyceride mobilization	4.36	up	0.046302	0.231214	yes
	BP	GO:0008150	histone H2A-H2B dimer displacement	-1.04	down	0.049535	0.231214	yes
	BP	GO:0008150	paranodal junction assembly	1.41	up	0.049535	0.231214	yes
	BP	GO:0008150	p-aminobenzoyl-glutamate transport	-2.41	down	0.049535	0.231214	yes
	MF	GO:0003674	NADH kinase activity	1.55	up	0.049535	0.231214	yes
	BP	GO:0008150	proteasome assembly	2.86	up	0.046302	0.231214	yes
	MF	GO:0003674	guanosine deaminase activity	1.71	up	0.049535	0.231214	yes
	CC	GO:0005575	CBF3 complex	1.51	up	0.049535	0.231214	yes
	MF	GO:0003674	bis(5'-adenosyl)-pentaphosphatase activity	-1.11	down	0.049535	0.231214	yes
	MF	GO:0003674	sodium:potassium:chloride symporter activity	1.31	up	0.049535	0.231214	yes
	MF	GO:0003674	cation:chloride symporter activity	1.31	up	0.049535	0.231214	yes
	MF	GO:0003674	sodium:chloride symporter activity	1.31	up	0.049535	0.231214	yes
	BP	GO:0008150	chloride ion homeostasis	1.31	up	0.049535	0.231214	yes
	BP	GO:0008150	potassium ion homeostasis	1.31	up	0.049535	0.231214	yes
	BP	GO:0008150	sodium ion homeostasis	1.31	up	0.049535	0.231214	yes
	BP	GO:0008150	response to brassinosteroid	-2.18	down	0.049535	0.231214	yes
	BP	GO:0008150	long term synaptic depression	2.38	up	0.049535	0.231214	yes
	BP	GO:0008150	regulation of endocannabinoid signaling pathway	2.38	up	0.049535	0.231214	yes
	BP	GO:0008150	negative regulation of cellular response to heat	-1.97	down	0.049535	0.231214	yes
	BP	GO:0008150	gastrulation with mouth forming second	Inf	up	0.036904	0.231214	yes
	BP	GO:0008150	negative regulation of cell adhesion	Inf	up	0.036904	0.231214	yes
SM/NPK	BP	GO:0008150	RNA-dependent DNA biosynthetic process	-1.37	down	0.049535	0.208515	yes
	CC	GO:0005575	viral assembly intermediate	-1.83	down	0.049535	0.208515	yes
	MF	GO:0003674	deoxynucleotide 3'-phosphatase activity	-1.11	down	0.049535	0.208515	yes
	BP	GO:0008150	provirus excision	-1.28	down	0.049535	0.208515	yes
	MF	GO:0003674	maltodextrin transmembrane transporter activity	-1.79	down	0.049535	0.208515	yes
	CC	GO:0005575	cytoplasmic ribonucleoprotein granule	-1	down	0.049535	0.208515	yes
	MF	GO:0003674	ATP-dependent DNA/RNA helicase activity	1.05	up	0.049535	0.208515	yes
	CC	GO:0005575	retrotransposon nucleocapsid	-4.7	down	0.049535	0.208515	yes
	BP	GO:0008150	xanthophyll catabolic process	-1.07	down	0.049535	0.208515	yes
	BP	GO:0008150	primitive erythrocyte differentiation	1.24	up	0.049535	0.208515	yes
	BP	GO:0008150	sterol catabolic process	-1.07	down	0.049535	0.208515	yes
	MF	GO:0003674	exodeoxyribonuclease I activity	1.83	up	0.049535	0.208515	yes
	BP	GO:0008150	response to leucine	-1.08	down	0.049535	0.208515	yes
	BP	GO:0008150	hemoglobin biosynthetic process	-1.05	down	0.049535	0.208515	yes
	BP	GO:0008150	MyD88-dependent toll-like receptor signaling pathway	-1.02	down	0.049535	0.208515	yes
	BP	GO:0008150	regulation of ossification	1.07	up	0.049535	0.208515	yes
	BP	GO:0008150	tyrosine biosynthetic process from chorismate via 4-hydroxyphenylpyruvate	-1.92	down	0.049535	0.208515	yes
	MF	GO:0003674	L-leucine:2-oxoglutarate aminotransferase activity	-1.92	down	0.049535	0.208515	yes
	BP	GO:0008150	swimming	1.16	up	0.049535	0.208515	yes
	BP	GO:0008150	cell chemotaxis	-1.13	down	0.049535	0.208515	yes
	BP	GO:0008150	glycophagy	1.13	up	0.049535	0.208515	yes
	BP	GO:0008150	positive regulation of glycogen catabolic process	1.1	up	0.049535	0.208515	yes
	MF	GO:0003674	tRNA m6t6A37 methyltransferase activity	1.14	up	0.049535	0.208515	yes
	BP	GO:0008150	regulation of transcription from RNA polymerase II promoter in response to oxidative stress	-1.28	down	0.049535	0.208515	yes
	BP	GO:0008150	positive regulation of transcription from RNA polymerase II promoter in response to heat stress	-1.28	down	0.049535	0.208515	yes
	BP	GO:0008150	regulation of conjugation with cellular fusion by regulation of transcription from RNA polymerase II promoter	-1.28	down	0.049535	0.208515	yes
	MF	GO:0003674	UDP-sugar diphosphatase activity	-1.08	down	0.049535	0.208515	yes
	CC	GO:0005575	viral capsid	-1.96	down	0.049535	0.208515	yes
	BP	GO:0008150	regulation of lipid storage	1.15	up	0.049535	0.208515	yes
	BP	GO:0008150	putrescine metabolic process	1.02	up	0.049535	0.208515	yes
	CC	GO:0005575	F-actin capping protein complex	-1.66	down	0.049535	0.208515	yes
	BP	GO:0008150	barbed-end actin filament capping	-1.66	down	0.049535	0.208515	yes
	MF	GO:0003674	maltose transmembrane transporter activity	-2.06	down	0.049535	0.208515	yes
	BP	GO:0008150	fungal-type cell wall chitin biosynthetic process	1.13	up	0.049535	0.208515	yes
	BP	GO:0008150	entry into host cell	-1.19	down	0.049535	0.208515	yes
	MF	GO:0003674	phenylalanine ammonia-lyase activity	-1.61	down	0.049535	0.208515	yes
	BP	GO:0008150	toll-like receptor TLR1:TLR2 signaling pathway	-1.05	down	0.049535	0.208515	yes
	MF	GO:0003674	aminoglycoside phosphotransferase activity	1.61	up	0.049535	0.208515	yes
	BP	GO:0008150	photosystem II assembly	1.46	up	0.049535	0.208515	yes
	BP	GO:0008150	detection of maltose stimulus	-2.17	down	0.049535	0.208515	yes
	MF	GO:0003674	maltose binding	-2.17	down	0.049535	0.208515	yes
	BP	GO:0008150	regulation of RNA metabolic process	-1.4	down	0.049535	0.208515	yes
	BP	GO:0008150	viral capsid assembly	-3.14	down	0.049535	0.208515	yes
	MF	GO:0003674	beta-catenin binding	-1.51	down	0.049535	0.208515	yes
	BP	GO:0008150	response to defense-related host nitric oxide production	-1.03	down	0.049535	0.208515	yes
	CC	GO:0005575	chloroplast intermembrane space	1.1	up	0.049535	0.208515	yes
	MF	GO:0003674	ribosomal protein S6 kinase activity	-1.15	down	0.049535	0.208515	yes
	BP	GO:0008150	maintenance of CRISPR repeat elements	-2.82	down	0.049535	0.208515	yes
	MF	GO:0003674	2,3-dihydro-2,3-dihydroxybenzoate dehydrogenase activity	-1.07	down	0.049535	0.208515	yes
	BP	GO:0008150	neuroblast proliferation	-1.27	down	0.049535	0.208515	yes
	BP	GO:0008150	age-dependent response to oxidative stress	1.1	up	0.049535	0.208515	yes
	MF	GO:0003674	p53 binding	-1.86	down	0.049535	0.208515	yes
	CC	GO:0005575	DNA helicase A complex	-1.05	down	0.049535	0.208515	yes
	MF	GO:0003674	copper ion sensor activity	1.57	up	0.049535	0.208515	yes
	MF	GO:0003674	endopolyphosphatase activity	-1.26	down	0.049535	0.208515	yes
	BP	GO:0008150	secondary shoot formation	-2.31	down	0.049535	0.208515	yes
	MF	GO:0003674	ribonuclease inhibitor activity	-1.42	down	0.049535	0.208515	yes
	BP	GO:0008150	leukocyte migration	-1.46	down	0.049535	0.208515	yes
	CC	GO:0005575	extrinsic component of endoplasmic reticulum membrane	1.26	up	0.049535	0.208515	yes
	BP	GO:0008150	positive regulation of invasive growth in response to glucose limitation	1.26	up	0.049535	0.208515	yes
	BP	GO:0008150	aldonate transmembrane transport	1.5	up	0.049535	0.208515	yes
	MF	GO:0003674	6-deoxy-6-sulfofructose kinase activity	1.51	up	0.049535	0.208515	yes
	MF	GO:0003674	4-chlorobenzoyl-CoA dehalogenase activity	1.15	up	0.049535	0.208515	yes
	BP	GO:0008150	N-acetylglucosamine biosynthetic process	1.93	up	0.049535	0.208515	yes
	MF	GO:0003674	preQ1 synthase activity	1.26	up	0.049535	0.208515	yes
	BP	GO:0008150	mitotic sister chromatid segregation	-1.31	down	0.049535	0.208515	yes
	MF	GO:0003674	CAAX-protein geranylgeranyltransferase activity	1.15	up	0.049535	0.208515	yes
	MF	GO:0003674	D-serine transmembrane transporter activity	1.36	up	0.049535	0.208515	yes
	BP	GO:0008150	diterpenoid biosynthetic process	1.02	up	0.049535	0.208515	yes
	BP	GO:0008150	regulation of shoot system development	-1.97	down	0.049535	0.208515	yes
	CC	GO:0005575	T=7 icosahedral viral capsid	-2.46	down	0.049535	0.208515	yes
	BP	GO:0008150	fatty acid transmembrane transport	-2.37	down	0.049535	0.208515	yes
	BP	GO:0008150	retinoic acid receptor signaling pathway	-2.07	down	0.049535	0.208515	yes
	BP	GO:0008150	indoleacetic acid metabolic process	1.32	up	0.049535	0.208515	yes
	MF	GO:0003674	protein-arginine omega-N monomethyltransferase activity	1.4	up	0.049535	0.208515	yes
	MF	GO:0003674	COPII adaptor activity	-1.99	down	0.049535	0.208515	yes
	MF	GO:0003674	L-arabinose:NADP reductase activity	1.19	up	0.049535	0.208515	yes
	BP	GO:0008150	pituitary gland development	-1.43	down	0.049535	0.208515	yes
	MF	GO:0003674	all-trans-beta-apo-10'-carotenal cleavage oxygenase activity	-2.7	down	0.049535	0.208515	yes
	MF	GO:0003674	9-cis-10'-apo-beta-carotenal cleavage oxygenase activity	-2.7	down	0.049535	0.208515	yes
	BP	GO:0008150	strigolactone biosynthetic process	-2.7	down	0.049535	0.208515	yes
	BP	GO:0008150	meiotic gene conversion	1.07	up	0.049535	0.208515	yes
	MF	GO:0003674	sepiapterin reductase activity	-2.21	down	0.049535	0.208515	yes
	MF	GO:0003674	nucleoside:proton symporter activity	-1.79	down	0.049535	0.208515	yes
	MF	GO:0003674	flavonol 3-sulfotransferase activity	-1.5	down	0.049535	0.208515	yes
	MF	GO:0003674	steroid sulfotransferase activity	-1.5	down	0.049535	0.208515	yes
	BP	GO:0008150	female meiotic nuclear division	-3.24	down	0.049535	0.208515	yes
	BP	GO:0008150	microtubule anchoring at centrosome	-3.24	down	0.049535	0.208515	yes
	BP	GO:0008150	malate transport	1.09	up	0.049535	0.208515	yes
	CC	GO:0005575	filopodium	-2.69	down	0.049535	0.208515	yes
	CC	GO:0005575	plastid nucleoid	-1.82	down	0.049535	0.208515	yes
	BP	GO:0008150	heparan sulfate proteoglycan biosynthetic process, enzymatic modification	-1.89	down	0.049535	0.208515	yes
	MF	GO:0003674	heparan sulfate 6-O-sulfotransferase activity	-1.89	down	0.049535	0.208515	yes
	BP	GO:0008150	positive regulation of interleukin-12 production	-1.77	down	0.049535	0.208515	yes
	BP	GO:0008150	peptidyl-arginine methylation, to symmetrical-dimethyl arginine	1.46	up	0.049535	0.208515	yes
	BP	GO:0008150	maintenance of protein localization in endoplasmic reticulum	1.17	up	0.049535	0.208515	yes
	BP	GO:0008150	spermidine acetylation	1.64	up	0.049535	0.208515	yes
	BP	GO:0008150	auxin efflux	-1.64	down	0.049535	0.208515	yes
	BP	GO:0008150	flavonol biosynthetic process	-1.64	down	0.049535	0.208515	yes
	BP	GO:0008150	skeletal system morphogenesis	-1.23	down	0.049535	0.208515	yes
	BP	GO:0008150	epithelial tube branching involved in lung morphogenesis	-1.23	down	0.049535	0.208515	yes
	BP	GO:0008150	P granule organization	-1.15	down	0.049535	0.208515	yes
	MF	GO:0003674	cardiolipin hydrolase activity	-1.15	down	0.049535	0.208515	yes
	BP	GO:0008150	cellular response to genistein	1.07	up	0.049535	0.208515	yes
	BP	GO:0008150	regulation of phagocytosis	-1.09	down	0.049535	0.208515	yes
	BP	GO:0008150	B cell cytokine production	-1.56	down	0.049535	0.208515	yes
	BP	GO:0008150	positive regulation of T cell mediated immune response to tumor cell	-1.56	down	0.049535	0.208515	yes
	CC	GO:0005575	cyclin-dependent protein kinase activating kinase holoenzyme complex	-1.56	down	0.049535	0.208515	yes
	CC	GO:0005575	coated vesicle	-1.56	down	0.049535	0.208515	yes
	BP	GO:0008150	positive regulation of interferon-alpha production	-1.56	down	0.049535	0.208515	yes
	BP	GO:0008150	positive regulation of interferon-gamma production	-1.56	down	0.049535	0.208515	yes
	BP	GO:0008150	positive regulation of interleukin-10 production	-1.56	down	0.049535	0.208515	yes
	BP	GO:0008150	positive regulation of interleukin-6 production	-1.56	down	0.049535	0.208515	yes
	CC	GO:0005575	lipopolysaccharide receptor complex	-1.56	down	0.049535	0.208515	yes
	BP	GO:0008150	isotype switching to IgG isotypes	-1.56	down	0.049535	0.208515	yes
	BP	GO:0008150	positive regulation of T cell activation	-1.56	down	0.049535	0.208515	yes
	MF	GO:0003674	2-octaprenylphenol hydroxylase activity	-2.28	down	0.049535	0.208515	yes
	BP	GO:0008150	L-asparagine biosynthetic process	1.34	up	0.049535	0.208515	yes
	BP	GO:0008150	cellular response to lipid	-2.23	down	0.049535	0.208515	yes
	BP	GO:0008150	neuroblast development	-1.32	down	0.049535	0.208515	yes
	BP	GO:0008150	ganglion mother cell fate determination	-1.32	down	0.049535	0.208515	yes
	BP	GO:0008150	neuroblast fate determination	-1.32	down	0.049535	0.208515	yes
	BP	GO:0008150	regulation of synaptic growth at neuromuscular junction	-1.32	down	0.049535	0.208515	yes
	BP	GO:0008150	rRNA transcription	-1.32	down	0.049535	0.208515	yes
	BP	GO:0008150	segmentation	-1.32	down	0.049535	0.208515	yes
	CC	GO:0005575	basal cortex	-1.32	down	0.049535	0.208515	yes
	BP	GO:0008150	regulation of neurogenesis	-1.32	down	0.049535	0.208515	yes
	BP	GO:0008150	asymmetric neuroblast division resulting in ganglion mother cell formation	-1.32	down	0.049535	0.208515	yes
	BP	GO:0008150	regulation of synaptic vesicle endocytosis	-1.32	down	0.049535	0.208515	yes
	BP	GO:0008150	regulation of neuroblast proliferation	-1.32	down	0.049535	0.208515	yes
	MF	GO:0003674	trans-2-decenoyl-acyl-carrier-protein isomerase activity	1.33	up	0.049535	0.208515	yes
	BP	GO:0008150	response to nematicide	-2	down	0.049535	0.208515	yes
	BP	GO:0008150	terrequinone A biosynthetic process	-1.05	down	0.049535	0.208515	yes
	MF	GO:0003674	guanidinoacetate N-methyltransferase activity	-1.65	down	0.049535	0.208515	yes
	BP	GO:0008150	karyogamy	1.73	up	0.049535	0.208515	yes
	BP	GO:0008150	regulation of arginine biosynthetic process	1.52	up	0.049535	0.208515	yes
	CC	GO:0005575	prospore membrane	-3.66	down	0.049535	0.208515	yes
	BP	GO:0008150	calcium-mediated signaling	-2.97	down	0.049535	0.208515	yes
	BP	GO:0008150	ribonucleotide biosynthetic process	1.29	up	0.049535	0.208515	yes
	MF	GO:0003674	penicillinase activity	-1.24	down	0.049535	0.208515	yes
	MF	GO:0003674	cephalosporinase activity	-1.24	down	0.049535	0.208515	yes
	BP	GO:0008150	regulation of secretion	-2.73	down	0.049535	0.208515	yes
	BP	GO:0008150	posttranscriptional gene silencing by RNA	1.2	up	0.049535	0.208515	yes
	MF	GO:0003674	pectin lyase activity	2.12	up	0.049535	0.208515	yes
	BP	GO:0008150	glucan metabolic process	-5.5	down	0.046302	0.208515	yes
	BP	GO:0008150	positive regulation of RNA splicing	1.21	up	0.049535	0.208515	yes
	BP	GO:0008150	negative regulation of glucokinase activity	1.26	up	0.049535	0.208515	yes
	BP	GO:0008150	hexitol metabolic process	-1.71	down	0.049535	0.208515	yes
	BP	GO:0008150	phosphatidylinositol-mediated signaling	2.34	up	0.049535	0.208515	yes
	CC	GO:0005575	secretory granule lumen	1.11	up	0.049535	0.208515	yes
	MF	GO:0003674	mercury ion transmembrane transporter activity	1.38	up	0.049535	0.208515	yes
	BP	GO:0008150	mercury ion transport	1.38	up	0.049535	0.208515	yes
	MF	GO:0003674	mercury ion binding	1.38	up	0.049535	0.208515	yes
	MF	GO:0003674	oxoglutarate:malate antiporter activity	1.31	up	0.049535	0.208515	yes
	BP	GO:0008150	intra-S DNA damage checkpoint	1.15	up	0.049535	0.208515	yes
	BP	GO:0008150	first cell cycle pseudocleavage	2.18	up	0.049535	0.208515	yes
	BP	GO:0008150	maintenance of centrosome location	2.18	up	0.049535	0.208515	yes
	BP	GO:0008150	positive regulation of oocyte maturation	2.18	up	0.049535	0.208515	yes
	BP	GO:0008150	regulation of meiotic cell cycle process involved in oocyte maturation	2.18	up	0.049535	0.208515	yes
	BP	GO:0008150	exit from meiosis	2.18	up	0.049535	0.208515	yes
	CC	GO:0005575	translation release factor complex	-1.52	down	0.049535	0.208515	yes
	MF	GO:0003674	tRNA-specific adenosine deaminase activity	Inf	up	0.036904	0.208515	yes
	BP	GO:0008150	L-ascorbic acid catabolic process	-2.65	down	0.049535	0.208515	yes
	BP	GO:0008150	regulation of epidermal growth factor receptor signaling pathway	2.57	up	0.046302	0.208515	yes
	BP	GO:0008150	neurotransmitter secretion	-2.49	down	0.049535	0.208515	yes
	BP	GO:0008150	multidimensional cell growth	1.6	up	0.049535	0.208515	yes
	BP	GO:0008150	plant-type primary cell wall biogenesis	1.6	up	0.049535	0.208515	yes
	CC	GO:0005575	cellulose synthase complex	1.6	up	0.049535	0.208515	yes
	MF	GO:0003674	cellulose synthase (UDP-forming) activity	1.6	up	0.049535	0.208515	yes
	BP	GO:0008150	positive regulation of sulfur metabolic process	-Inf	down	0.036904	0.208515	yes
	CC	GO:0005575	integral component of Golgi membrane	2.45	up	0.049535	0.208515	yes
	BP	GO:0008150	dorsal trunk growth, open tracheal system	-2.46	down	0.049535	0.208515	yes
	BP	GO:0008150	pupal chitin-based cuticle development	1.78	up	0.049535	0.208515	yes
	BP	GO:0008150	sperm storage	1.78	up	0.049535	0.208515	yes
	BP	GO:0008150	slug development involved in sorocarp development	3.14	up	0.046302	0.208515	yes
	MF	GO:0003674	inulinase activity	Inf	up	0.036904	0.208515	yes

## Sheet: Supplementary Table 10
Table S10. GO classifications of shared enriched terms in the foxtail millet rhizosphere soil under different fertilizer conditions.
Category	GO ID	Description	CM/NPK	PM/NPK	SM/NPK
CC	GO:0005575	viral assembly intermediate	√	√	√
MF	GO:0003674	maltodextrin transmembrane transporter activity	√	√	√
MF	GO:0003674	ATP-dependent DNA/RNA helicase activity	√	√	√
CC	GO:0005575	retrotransposon nucleocapsid	√	√	√
BP	GO:0008150	glycophagy	√	√	√
BP	GO:0008150	tyrosine biosynthetic process from chorismate via 4-hydroxyphenylpyruvate	√	√	√
MF	GO:0003674	L-leucine:2-oxoglutarate aminotransferase activity	√	√	√
BP	GO:0008150	positive regulation of glycogen catabolic process	√	√	√
BP	GO:0008150	regulation of transcription from RNA polymerase II promoter in response to oxidative stress	√	√	√
BP	GO:0008150	positive regulation of transcription from RNA polymerase II promoter in response to heat stress	√	√	√
BP	GO:0008150	regulation of conjugation with cellular fusion by regulation of transcription from RNA polymerase II promoter	√	√	√
MF	GO:0003674	exodeoxyribonuclease I activity	√	√	√
CC	GO:0005575	viral capsid	√	√	√
CC	GO:0005575	prospore membrane	√	√	√
BP	GO:0008150	viral capsid assembly	√	√	√
BP	GO:0008150	photosystem II assembly	√	√	√
BP	GO:0008150	maintenance of CRISPR repeat elements	√	√	√
MF	GO:0003674	preQ1 synthase activity	√	√	√
MF	GO:0003674	6-deoxy-6-sulfofructose kinase activity	√	√	√
BP	GO:0008150	secondary shoot formation	√	√	√
MF	GO:0003674	2,3-dihydro-2,3-dihydroxybenzoate dehydrogenase activity	√	√	√
MF	GO:0003674	all-trans-beta-apo-10'-carotenal cleavage oxygenase activity	√	√	√
MF	GO:0003674	9-cis-10'-apo-beta-carotenal cleavage oxygenase activity	√	√	√
BP	GO:0008150	strigolactone biosynthetic process	√	√	√
CC	GO:0005575	T=7 icosahedral viral capsid	√	√	√
BP	GO:0008150	retinoic acid receptor signaling pathway	√	√	√
MF	GO:0003674	COPII adaptor activity	√	√	√
CC	GO:0005575	plastid nucleoid	√	√	√
MF	GO:0003674	nucleoside:proton symporter activity	√	√	√
BP	GO:0008150	N-acetylglucosamine biosynthetic process	√	√	√
CC	GO:0005575	filopodium	√	√	√
BP	GO:0008150	response to nematicide	√	√	√
BP	GO:0008150	positive regulation of interleukin-12 production	√	√	√
MF	GO:0003674	2-octaprenylphenol hydroxylase activity	√	√	√
BP	GO:0008150	neuroblast fate determination	√	√	√
BP	GO:0008150	regulation of synaptic growth at neuromuscular junction	√	√	√
BP	GO:0008150	rRNA transcription	√	√	√
BP	GO:0008150	segmentation	√	√	√
CC	GO:0005575	basal cortex	√	√	√
BP	GO:0008150	regulation of neurogenesis	√	√	√
BP	GO:0008150	asymmetric neuroblast division resulting in ganglion mother cell formation	√	√	√
BP	GO:0008150	regulation of synaptic vesicle endocytosis	√	√	√
BP	GO:0008150	regulation of neuroblast proliferation	√	√	√
BP	GO:0008150	B cell cytokine production	√	√	√
BP	GO:0008150	positive regulation of T cell mediated immune response to tumor cell	√	√	√
CC	GO:0005575	cyclin-dependent protein kinase activating kinase holoenzyme complex	√	√	√
CC	GO:0005575	coated vesicle	√	√	√
BP	GO:0008150	positive regulation of interferon-alpha production	√	√	√
BP	GO:0008150	positive regulation of interferon-gamma production	√	√	√
BP	GO:0008150	positive regulation of interleukin-10 production	√	√	√
BP	GO:0008150	positive regulation of interleukin-6 production	√	√	√
CC	GO:0005575	lipopolysaccharide receptor complex	√	√	√
BP	GO:0008150	isotype switching to IgG isotypes	√	√	√
BP	GO:0008150	positive regulation of T cell activation	√	√	√
BP	GO:0008150	positive regulation of RNA splicing	√	√	√
MF	GO:0003674	oxoglutarate:malate antiporter activity	√	√	√
BP	GO:0008150	negative regulation of glucokinase activity	√	√	√

[truncated: 2 more sheets: Supplementary Table 11, Supplementary Table 12]
